# Supplementary material
Source: PubMed Central journal article supplement (PMC4249014)
Supplement: AEM.02389-14_zam999105774so1.pdf [file AEM.02389-14_zam999105774so1.pdf]

Table S1: Properties of the amendments applied in the 2011 and 2012 seasons.

|                | 2011 Biosolid | 2012 Sewage sludge |
|----------------|---------------|--------------------|
| pH             | 8.2           | 7.9                |
| Sulfur (ppm)   | 4720          | 1755               |
| Dry matter (%) | 32.9          | 27.2               |
| Total N (%)    | 0.9           | 1.54               |
| NH4-N (ppm)    | 1539          | 2592               |
| Total P (%)    | 0.83          | 0.54               |
| Phosphate (%)  | 1.91          | 1.24               |
| Total K (%)    | 0.13          | 0.04               |
| Potash (%)     | 0.16          | 0.05               |
| OM (%)         | 14.4          | 21.5               |
| C:N ratio      | 9:1           | 8:1                |
| Na (%)         | 0.06          | 0.04               |
| Al (ppm)       | 8927          | 566                |
| B (ppm)        | 12.2          | 3.3                |
| Ca (%)         | 1.89          | 0.6                |
| Cu (ppm)       | 170           | 94                 |
| Fe (ppm)       | 23207         | 10298              |
| Mg (ppm)       | 0.48          | 0.09               |
| Mn (ppm)       | 137           | 71                 |
| Zn (ppm)       | 260           | 124                |

Table S2: Dates (in Julian day) of biosolids (2011) and sewage sludge (2012) applications, planting date and harvest date for the indicated crops. The number of days between application of the biosolids and crop harvest are indicated, as well as irrigation schedule.

| 2011 APPLICATION TO HARVEST SCHEDULE                                                              |                                                                                                                |                                               |                                          |                                             |
|---------------------------------------------------------------------------------------------------|----------------------------------------------------------------------------------------------------------------|-----------------------------------------------|------------------------------------------|---------------------------------------------|
| APPLICATION                                                                                       | PLANT DATE<br>(days after application)                                                                         | IRRIGATION<br>(wc=Water Can)<br>(oh=Overhead) | HARVEST DATE<br>(days after application) | DAYS TO HARVEST<br>(days after application) |
| June 16 <sup>th</sup> 2011<br>(day 167)                                                           | June 17 <sup>th</sup> (day 168)<br>SOIL SAMPLES<br>Day 0 (167)<br>Day 7 (174)<br>Day 30 (197)<br>Harvest (262) | June 20 (day 171) wc-drench                   | Sept 19 <sup>th</sup> (day262)           | Tomato (95d)                                |
|                                                                                                   |                                                                                                                | June 28 (day 179) wc-drench                   |                                          |                                             |
|                                                                                                   |                                                                                                                | July 8 (day 189) wc-drench                    |                                          |                                             |
|                                                                                                   |                                                                                                                | July 15 (day 197) oh-13mm                     |                                          |                                             |
|                                                                                                   |                                                                                                                | July 18 (day 200) oh-20mm                     |                                          |                                             |
|                                                                                                   |                                                                                                                | July 22 (day 204) oh-20mm                     |                                          |                                             |
|                                                                                                   | June 17 <sup>th</sup> (day 168)<br>SOIL SAMPLES<br>Day 0 (167)<br>Day 7 (174)<br>Day 30 (197)<br>Harvest (262) | June 20 (day 171) wc-drench                   | Sept 19 <sup>th</sup> (day262)           | Pepper (95d)                                |
|                                                                                                   |                                                                                                                | June 28 (day 179) wc-drench                   |                                          |                                             |
|                                                                                                   |                                                                                                                | July 15 (day 197) oh-13mm                     |                                          |                                             |
|                                                                                                   |                                                                                                                | July 18 (day 200) oh-20mm                     |                                          |                                             |
|                                                                                                   | June 20 <sup>th</sup> (day 171)<br>SOIL SAMPLES<br>Day 0 (167)<br>Day 7 (174)<br>Day 30 (197)<br>Harvest (297) | June 30 (day 182) wc-drench                   | Oct. 24 <sup>th</sup> (day 297)          | Carrot (130d)                               |
|                                                                                                   |                                                                                                                | July 11(day 193) wc-drench                    |                                          |                                             |
|                                                                                                   |                                                                                                                | July 15 (day 197) oh-13mm                     |                                          |                                             |
|                                                                                                   |                                                                                                                | July 18 (day 200) oh-20mm                     |                                          |                                             |
|                                                                                                   | July 5 <sup>th</sup> (day 186)<br>SOIL SAMPLES<br>Day 0 (167)<br>Day 7 (174)<br>Day 30 (197)<br>Harvest (276)  | July 8 (day 189) wc-drench                    | Oct. 3 <sup>rd</sup> (day 276)           | Cucumber (109d)                             |
| July 11(day 193) wc-drench                                                                        |                                                                                                                |                                               |                                          |                                             |
| July 15 (day 197) oh-13mm                                                                         |                                                                                                                |                                               |                                          |                                             |
| July 18 (day 200) oh-20mm                                                                         |                                                                                                                |                                               |                                          |                                             |
| Sept. 21 (day 264)<br>SOIL SAMPLES<br>Day 0 (167)<br>Day 7 (174)<br>Day 30 (197)<br>Harvest (304) |                                                                                                                | Oct. 31 <sup>st</sup> (day 304)               | Radish (137d)                            |                                             |
|                                                                                                   |                                                                                                                |                                               |                                          |                                             |

| 2012 APPLICATION TO HARVEST SCHEDULE   |                                                                                                               |                                               |                                          |                                             |
|----------------------------------------|---------------------------------------------------------------------------------------------------------------|-----------------------------------------------|------------------------------------------|---------------------------------------------|
| APPLICATION                            | PLANT DATE<br>(days after application)                                                                        | IRRIGATION<br>(wc=Water Can)<br>(oh=Overhead) | HARVEST DATE<br>(days after application) | DAYS TO HARVEST<br>(days after application) |
| May 17 <sup>th</sup> 2012<br>(day 138) | June 8 <sup>th</sup> (day 160)<br>SOIL SAMPLES<br>Day 0 (138)<br>Day 7 (145)<br>Day 30 (166)<br>Harvest (242) | June 11 (day 163) wc-drench                   | Aug. 29 <sup>th</sup> (day242)           | Tomato (104d)                               |
|                                        |                                                                                                               | June 14 (day 166) wc-drench                   |                                          |                                             |
|                                        |                                                                                                               | July 13 (day 195) oh-20mm                     |                                          |                                             |
|                                        |                                                                                                               | July 17 (day 199) oh-20mm                     |                                          |                                             |
|                                        |                                                                                                               | July 19 (day 201) oh-20mm                     |                                          |                                             |
|                                        |                                                                                                               | July 24 (day 206) oh-25mm                     |                                          |                                             |
|                                        |                                                                                                               | Aug. 3 (day 216) oh-25mm                      |                                          |                                             |
|                                        |                                                                                                               | Aug. 9 (day 222) oh-25mm                      |                                          |                                             |
|                                        | June 8 <sup>th</sup> (day 160)                                                                                | July 13 (day 195) oh-20mm                     | Sept 17 <sup>th</sup> (day261)           | Carrot (123d)                               |
|                                        |                                                                                                               | July 17 (day 199) oh-20mm                     |                                          |                                             |

|                                 |                    |                                  |                    |               |
|---------------------------------|--------------------|----------------------------------|--------------------|---------------|
|                                 | SOIL SAMPLES       | July 19 (day 201) oh-20mm        |                    |               |
|                                 | Day 0 (138)        | July 24 (day 206) oh-25mm        |                    |               |
|                                 | Day 7 (145)        | Aug. 3 (day 216) oh-25mm         |                    |               |
|                                 | Day 30 (166)       | Aug. 9 (day 222) oh-25mm         |                    |               |
|                                 | Harvest (261)      |                                  |                    |               |
|                                 | June 8th (day 160) | July 13 (day 195) oh-20mm        | Aug 15th (day 228) | Lettuce (90d) |
|                                 | SOIL SAMPLES       | July 17 (day 199) oh-20mm        |                    |               |
|                                 |                    | July 19 (day 201) oh-20mm        |                    |               |
|                                 |                    | July 24 (day 206) oh-25mm        |                    |               |
|                                 |                    | Aug. 3 (day 216) oh-25mm         |                    |               |
|                                 |                    | Aug. 9 (day 222) oh-25mm         |                    |               |
|                                 | Day 0 (138)        |                                  |                    |               |
| Day 7 (145)                     |                    |                                  |                    |               |
| Day 30 (166)                    |                    |                                  |                    |               |
| Harvest (228)                   |                    |                                  |                    |               |
| Aug. 24 <sup>th</sup> (day 237) |                    | Sept. 24 <sup>th</sup> (day 268) | Radish (130d)      |               |
| SOIL SAMPLES                    |                    |                                  |                    |               |
| Day 0 (138)                     |                    |                                  |                    |               |
| Day 7 (145)                     |                    |                                  |                    |               |
| Day 30 (166)                    |                    |                                  |                    |               |
| Harvest (268)                   |                    |                                  |                    |               |

| 2013 APPLICATION TO HARVEST SCHEDULE   |                                        |                                               |                                          |                                             |
|----------------------------------------|----------------------------------------|-----------------------------------------------|------------------------------------------|---------------------------------------------|
| APPLICATION                            | PLANT DATE<br>(days after application) | IRRIGATION<br>(wc=Water Can)<br>(oh=Overhead) | HARVEST DATE<br>(days after application) | DAYS TO HARVEST<br>(days after application) |
| May 17 <sup>th</sup> 2012<br>(day 138) | May 9 <sup>th</sup> (357)              |                                               | July 30 <sup>th</sup> (439)              | Lettuce (439d)                              |
|                                        | SOIL SAMPLES                           |                                               |                                          |                                             |
|                                        | Day 350 (May 2 2013)                   |                                               |                                          |                                             |
|                                        | Day 385 (June 6 2013)                  |                                               |                                          |                                             |
|                                        | Harvest (439)                          |                                               |                                          |                                             |
|                                        | May 9 <sup>th</sup> (357)              |                                               | Jun 18 <sup>th</sup> (397)               | Radish (397d)                               |
|                                        | SOIL SAMPLES                           |                                               |                                          |                                             |
|                                        | Day 350 (May 2 2013)                   |                                               |                                          |                                             |
|                                        | Day 385 (June 6 2013)                  |                                               |                                          |                                             |
|                                        | Harvest (397)                          |                                               |                                          |                                             |
|                                        | Jul 16 <sup>th</sup> (425)             |                                               | Oct 29 <sup>th</sup> (530)               | Carrot (530d)                               |
|                                        | SOIL SAMPLES                           |                                               |                                          |                                             |
|                                        | Day 350 (May 2 2013)                   |                                               |                                          |                                             |
|                                        | Day 385 (June 6 2013)                  |                                               |                                          |                                             |
|                                        | Harvest (530)                          |                                               |                                          |                                             |
|                                        |                                        |                                               |                                          |                                             |

Supplementary Table 3. (a) Primers used for PCR detection of gene targets; (b) Sequence validation of the expected PCR product; (c) primers and probes used for quantitative PCR and (d) qPCR cycling conditions

Table 3a

| Primer gene target name      | Target, or target class         | Annealing temperature | Reference                      |
|------------------------------|---------------------------------|-----------------------|--------------------------------|
| <b>Incompatibility</b>       |                                 |                       |                                |
| IncA/C                       | Incompatibility group A/C       | 60                    | Johnson <i>et al.</i> , 2007   |
| IncB/O                       | Incompatibility group B/O       | 60                    | Johnson <i>et al.</i> , 2007   |
| IncFIA                       | Incompatibility group FIA       | 60                    | Johnson <i>et al.</i> , 2007   |
| IncFIIA                      | Incompatibility group FIIA      | 60                    | Johnson <i>et al.</i> , 2007   |
| IncFIB                       | Incompatibility group FIB       | 60                    | Johnson <i>et al.</i> , 2007   |
| IncFIC                       | Incompatibility group FIC       | 60                    | Johnson <i>et al.</i> , 2007   |
| IncFrep                      | Incompatibility group Frep      | 60                    | Johnson <i>et al.</i> , 2007   |
| IncHI1                       | Incompatibility group HI1       | 60                    | Johnson <i>et al.</i> , 2007   |
| IncHI2                       | Incompatibility group HI2       | 60                    | Johnson <i>et al.</i> , 2007   |
| IncI1                        | Incompatibility group I1        | 60                    | Johnson <i>et al.</i> , 2007   |
| IncK/B                       | Incompatibility group K/B       | 60                    | Johnson <i>et al.</i> , 2007   |
| IncL/M                       | Incompatibility group L/M       | 60                    | Johnson <i>et al.</i> , 2007   |
| IncN                         | Incompatibility group N         | 60                    | Johnson <i>et al.</i> , 2007   |
| IncN <i>kikA</i>             | Incompatibility group N         | 55                    | Gotz <i>et al.</i> , 1996      |
| IncN <i>oriT</i>             | Incompatibility group N         | 49                    | Gotz <i>et al.</i> , 1996      |
| IncN <i>rep</i>              | Incompatibility group N         | 55                    | Gotz <i>et al.</i> , 1996      |
| IncP <i>korA</i>             | Incompatibility group P         | 52                    | Gotz <i>et al.</i> , 1996      |
| IncP <i>oriT</i>             | Incompatibility group P         | 57                    | Gotz <i>et al.</i> , 1996      |
| IncP <i>traG</i>             | Incompatibility group P         | 63                    | Gotz <i>et al.</i> , 1996      |
| IncP <i>trfA1</i>            | Incompatibility group P         | 57                    | Gotz <i>et al.</i> , 1996      |
| IncP <i>trfA2</i>            | Incompatibility group P         | 57                    | Gotz <i>et al.</i> , 1996      |
| IncQ <i>repB</i>             | Incompatibility group Q         | 62                    | Gotz <i>et al.</i> , 1996      |
| IncQ <i>oriT</i>             | Incompatibility group Q         | 57                    | Gotz <i>et al.</i> , 1996      |
| IncQ <i>oriV</i>             | Incompatibility group Q         | 57                    | Gotz <i>et al.</i> , 1996      |
| IncT                         | Incompatibility group T         | 60                    | Johnson <i>et al.</i> , 2007   |
| IncW                         | Incompatibility group W         | 60                    | Johnson <i>et al.</i> , 2007   |
| IncW <i>oriT</i>             | Incompatibility group W         | 51                    | Gotz <i>et al.</i> , 1996      |
| IncW <i>oriV</i>             | Incompatibility group W         | 58                    | Gotz <i>et al.</i> , 1996      |
| IncW <i>trwAB</i>            | Incompatibility group W         | 57                    | Gotz <i>et al.</i> , 1996      |
| IncX                         | Incompatibility group X         | 60                    | Johnson <i>et al.</i> , 2007   |
| IncY                         | Incompatibility group Y         | 60                    | Johnson <i>et al.</i> , 2007   |
| <b>Integrase</b>             |                                 |                       |                                |
| <i>int1</i>                  | Class 1 integrase               | 60                    | Shibata <i>et al.</i> , 2003   |
| <i>int2</i>                  | Class 2 integrase               | 60                    | Goldstein <i>et al.</i> , 2001 |
| <i>int3</i>                  | Class 3 integrase               | 60                    | Goldstein <i>et al.</i> , 2001 |
| <b>Antibiotic Resistance</b> |                                 |                       |                                |
| <i>bla</i> <sub>CARB-4</sub> | Beta Lactamase resistance CARB  | 55                    | Bert <i>et al.</i> , 2002      |
| <i>bla</i> <sub>CTX-M</sub>  | Beta lactamase resistance CTX-M | 48                    | Hartmann <i>et al.</i> , 2012  |

|                                |                                                      |     |                                 |
|--------------------------------|------------------------------------------------------|-----|---------------------------------|
| <i>bla</i> <sub>CTX-M*</sub>   | Beta lactamase resistance CTX-M                      | 55  | Knapp <i>et al.</i> 2010        |
| <i>bla</i> <sub>GIM-1</sub>    | Beta lactamase resistance GIM-1                      | 53  | Mendes <i>et al.</i> , 2007     |
| <i>bla</i> <sub>IMP*</sub>     | Beta lactamase resistance IMP                        | 52  | Poirel <i>et al.</i> , 2011     |
| <i>bla</i> <sub>IMP-1</sub>    | Beta lactamase resistance IMP-1                      | 53  | Mendes <i>et al.</i> , 2007     |
| <i>bla</i> <sub>KPC-m*</sub>   | Beta lactamase resistance KPC                        | 52  | Poirel <i>et al.</i> , 2011     |
| <i>bla</i> <sub>NDM-1*</sub>   | Beta lactamase resistance NDM                        | 52  | Poirel <i>et al.</i> , 2011     |
| <i>bla</i> <sub>OXA-18</sub>   | Beta lactamase resistance OXA-18                     | 55  | Bert <i>et al.</i> , 2002       |
| <i>bla</i> <sub>OXA-20</sub>   | Beta lactamase resistance OXA-20                     | 55  | Bert <i>et al.</i> , 2002       |
| <i>bla</i> <sub>OXA-48*</sub>  | Beta lactamase resistance OXA-48                     | 52  | Poirel <i>et al.</i> , 2011     |
| <i>bla</i> <sub>OXA-V</sub>    | Beta lactamase resistance OXA-5                      | 55  | Bert <i>et al.</i> , 2002       |
| <i>bla</i> <sub>OXA-I</sub>    | Beta lactamase resistance OXAgroup I (OXA-10 group)  | 55  | Bert <i>et al.</i> , 2002       |
| <i>bla</i> <sub>OXA-II</sub>   | Beta lactamase resistance OXAgroup II (OXA-2 group)  | 55  | Bert <i>et al.</i> , 2002       |
| <i>bla</i> <sub>OXA-III</sub>  | Beta lactamase resistance OXAgroup III (OXA-1 group) | 55  | Bert <i>et al.</i> , 2002       |
| <i>bla</i> <sub>LCR-1</sub>    | Beta lactamase resistance OXA-LCR-1                  | 55  | Bert <i>et al.</i> , 2002       |
| <i>bla</i> <sub>PSE</sub>      | Beta lactamase PSE group (PSE-1, PSE-4,CARB-3)       | 55  | Bert <i>et al.</i> , 2002       |
| <i>bla</i> <sub>SHV</sub>      | Beta lactamase resistance SHV                        | 55  | Knapp <i>et al.</i> , 2010      |
|                                |                                                      |     |                                 |
| <i>bla</i> <sub>SPM-1</sub>    | Beta lactamase resistance SPM-1                      | 53  | Mendes <i>et al.</i> , 2007     |
| <i>bla</i> <sub>TEM*</sub>     | Beta lactamase resistance TEM                        | 55  | Reinthaler <i>et al.</i> , 2010 |
| <i>bla</i> <sub>VIM*</sub>     | Beta lactamase resistance VIM                        | 52  | Poirel <i>et al.</i> , 2011     |
| <i>bla</i> <sub>VIMgen-2</sub> | Beta lactamase resistance VIM-2                      | 53  | Mendes <i>et al.</i> , 2007     |
| <i>erm</i> (A)                 | erythromycin resistance locus A                      | 52  | Lina <i>et al.</i> , 1999       |
| <i>msr</i> (A)                 | erythromycin resistance locus A                      | 50  | Lina <i>et al.</i> , 1999       |
| <i>erm</i> (B)                 | erythromycin resistance locus B                      | 60  | Knapp <i>et al.</i> , 2010      |
| <i>msr</i> (B)                 | erythromycin resistance locus B                      | 50  | Lina <i>et al.</i> , 1999       |
| <i>erm</i> (C)                 | erythromycin resistance locus C                      | 60  | Knapp <i>et al.</i> , 2010      |
| <i>erm</i> (E)                 | erythromycin resistance locus E                      | 60  | Knapp <i>et al.</i> , 2010      |
| <i>erm</i> (F)                 | erythromycin resistance locus F                      | 60  | Knapp <i>et al.</i> , 2010      |
| <i>fos</i> (A-2)               | Fosfomycin resistance gene                           | 53  | Xu <i>et al.</i> , 2011         |
| <i>qnr</i> (A)                 | Quinolone resistance gene locus A                    | 53  | Robicsek <i>et al.</i> , 2006   |
| <i>qnr</i> (B)                 | Quinolone resistance gene locus B                    | 53  | Robicsek <i>et al.</i> , 2006   |
| <i>qnr</i> (S)                 | Quinolone resistance gene locus S                    | 53  | Robicsek <i>et al.</i> , 2006   |
| <i>aad</i> (A)                 | Streptomycin resistance gene                         | 64† | Boerlin <i>et al.</i> , 2005    |
| <i>str</i> (A)                 | Streptomycin resistance gene locus A                 | 55  | Boerlin <i>et al.</i> , 2005    |
| <i>str</i> (B)                 | Streptomycin resistance gene locus B                 | 55  | Boerlin <i>et al.</i> , 2005    |
| <i>sul1</i>                    | Sulfonamide resistance gene 1                        | 53  | Maynard <i>et al.</i> , 2003    |
| <i>sul3</i>                    | Sulfonamide resistance gene 3                        | 51  | Boerlin <i>et al.</i> , 2005    |
| <i>tet</i> (A)                 | tetracycline resistance gene A                       | 60† | Boerlin <i>et al.</i> , 2005    |
| <i>tet</i> (B)                 | tetracycline resistance gene B                       | 60† | Boerlin <i>et al.</i> , 2005    |
| <i>tet</i> (B/P)               | tetracycline resistance gene BP                      | 46  | Aminov <i>et al.</i> , 2001     |
| <i>tet</i> (M)                 | tetracycline resistance gene M                       | 55  | Aminov <i>et al.</i> , 2001     |
| <i>tet</i> (O)                 | tetracycline resistance gene O                       | 60  | Aminov <i>et al.</i> , 2001     |
| <i>otr</i> (A)                 | tetracycline resistance gene OtrA                    | 66  | Aminov <i>et al.</i> , 2001     |
| <i>tet</i> (Q)                 | tetracycline resistance gene Q                       | 63  | Aminov <i>et al.</i> , 2001     |
| <i>tet</i> (S)                 | tetracycline resistance gene S                       | 50  | Aminov <i>et al.</i> , 2001     |

|                   |                                      |    |                               |
|-------------------|--------------------------------------|----|-------------------------------|
| <i>tet(T)</i>     | tetracycline resistance gene T       | 46 | Aminov <i>et al.</i> , 2001   |
| <i>vga</i>        | type A streptogramin resistance gene | 54 | Lina <i>et al.</i> , 1999     |
|                   |                                      |    |                               |
| <i>vat(B)</i>     | type A streptogramin resistance gene | 52 | Lina <i>et al.</i> , 1999     |
| <i>vgb</i>        | type B streptogramin resistance gene | 53 | Lina <i>et al.</i> , 1999     |
| <i>van(A)</i>     | Vancomycin resistance gene A         | 58 | Kariyama <i>et al.</i> , 2000 |
| <i>van(B)</i>     | Vancomycin resistance gene B         | 58 | Elsayed <i>et al.</i> , 2001  |
| <i>van(C1)</i>    | Vancomycin resistance gene C1        | 54 | Kariyama <i>et al.</i> , 2000 |
| <i>van(C2/C3)</i> | Vancomycin resistance gene C2/C3     | 58 | Kariyama <i>et al.</i> , 2000 |

<sup>†</sup>Annealing temperature used was different than in original publications, \*Primer pair used only in 2012.

## References

1. **Aminov, R. I., N. Garrigues-Jeanjean, and R. I. Mackie.** 2001. Molecular ecology of tetracycline resistance: development and validation of primers for detection of tetracycline resistance genes encoding ribosomal protection proteins. *Appl. Environ. Microbiol.* **67**:22-32.
2. **Bert, F., C. Branger, and N. Lambert-Zechovsky.** 2002. Identification of PSE and OXA beta-lactamase genes in *Pseudomonas aeruginosa* using PCR-restriction fragment length polymorphism. *J. Antimicrob. Chemother.* **50**:11-18.
3. **Boerlin, P., R. Travis, C. L. Gyles, R. Reid-Smith, N. Janecko, H. Lim, V. Nicholson, S. A. McEwen, R. Friendship, and M. Archambault.** 2005. Antimicrobial resistance and virulence genes of *Escherichia coli* isolates from swine in Ontario. *Appl. Environ. Microbiol.* **71**:6753-6761.
4. **Elsayed, S., N. Hamilton, D. Boyd, and M. Mulvey.** 2001. Improved primer design for multiplex PCR analysis of vancomycin-resistant *Enterococcus* spp. *J. Clin. Microbiol.* **39**:2367-2368.
5. **Goldstein, C., M. D. Lee, S. Sanchez, C. Hudson, B. Phillips, B. Register, M. Grady, C. Liebert, A. O. Summers, D. G. White, and J. J. Maurer.** 2001. Incidence of class 1 and 2 integrases in clinical and commensal bacteria from livestock, companion animals, and exotics. *Antimicrob. Agents Chemother.* **45**:723-726.
6. **Gotz, A., R. Pukall, E. Smit, E. Tietze, R. Prager, H. Tschape, J. D. van Elsas, and K. Smalla.** 1996. Detection and characterization of broad-host-range plasmids in environmental bacteria by PCR. *Appl. Environ. Microbiol.* **62**:2621-2628.
7. **Hartmann, A., A. Locatelli, L. Amoureux, G. Depret, C. Jolivet, E. Gueneau, and C. Neuwirth.** 2012. Occurrence of CTX-M Producing *Escherichia coli* in Soils, Cattle, and Farm Environment in France (Burgundy Region). *Front. Microbiol.* **3**:83.
8. **Johnson, T. J., Y. M. Wannemuehler, S. J. Johnson, C. M. Logue, D. G. White, C. Doetkott, and L. K. Nolan.** 2007. Plasmid replicon typing of commensal and pathogenic *Escherichia coli* isolates. *Appl. Environ. Microbiol.* **73**:1976-1983.
9. **Kariyama, R., R. Mitsuhashi, J. W. Chow, D. B. Clewell, and H. Kumon.** 2000. Simple and reliable multiplex PCR assay for surveillance isolates of vancomycin-resistant enterococci. *J. Clin. Microbiol.* **38**:3092-3095.
10. **Knapp, C. W., J. Dolfing, P. A. Ehlert, and D. W. Graham.** 2010. Evidence of increasing antibiotic resistance gene abundances in archived soils since 1940. *Environ. Sci. Technol.* **44**:580-587.
11. **Lina, G., A. Quaglia, M. E. Reverdy, R. Leclercq, F. Vandenesch, and J. Etienne.** 1999. Distribution of genes encoding resistance to macrolides, lincosamides, and streptogramins among staphylococci. *Antimicrob. Agents Chemother.* **43**:1062-1066.
12. **Maynard, C., J. M. Fairbrother, S. Bekal, F. Sanschagrin, R. C. Levesque, R. Brousseau, L. Masson, S. Lariviere, and J. Harel.** 2003. Antimicrobial resistance genes in enterotoxigenic *Escherichia coli* O149:K91 isolates obtained over a 23-year period from pigs. *Antimicrob. Agents Chemother.* **47**:3214-3221.
13. **Mendes, R. E., K. A. Kiyota, J. Monteiro, M. Castanheira, S. S. Andrade, A. C. Gales, A. C. Pignatari, and S. Tufik.** 2007. Rapid detection and identification of metallo-beta-lactamase-encoding genes by multiplex real-time PCR assay and melt curve analysis. *J. Clin. Microbiol.* **45**:544-547.
14. **Poirel, L., T. R. Walsh, V. Cuvillier, and P. Nordmann.** 2011. Multiplex PCR for detection of acquired carbapenemase genes. *Diagn. Microbiol. Infect. Dis.* **70**:119-123.
15. **Reinthaler, F. F., G. Feierl, H. Galler, D. Haas, E. Leitner, F. Mascher, A. Melkes, J. Posch, I. Winter, G. Zarfel, and E. Marth.** 2010. ESBL-producing *E. coli* in Austrian sewage sludge. *Water Res.* **44**:1981-1985.

16. **Robicsek, A., J. Strahilevitz, D. F. Sahn, G. A. Jacoby, and D. C. Hooper.** 2006. *qnr* prevalence in ceftazidime-resistant *Enterobacteriaceae* isolates from the United States. *Antimicrob. Agents Chemother.* **50**:2872-2874.
17. **Shibata, N., Y. Doi, K. Yamane, T. Yagi, H. Kurokawa, K. Shibayama, H. Kato, K. Kai, and Y. Arakawa.** 2003. PCR typing of genetic determinants for metallo-beta-lactamases and integrases carried by gram-negative bacteria isolated in Japan, with focus on the class 3 integron. *J. Clin. Microbiol.* **41**:5407-5413.
18. **Xu, H., V. Miao, W. Kwong, R. Xia, and J. Davies.** 2011. Identification of a novel fosfomycin resistance gene (*fosA2*) in *Enterobacter cloacae* from the Salmon River, Canada. *Lett. Appl. Microbiol.* **52**:427-429.





|                                |                                                                                                                                                                                                                                                                                                                                                                                                                                                                                                                                                                                                                                                                                                                                                                                                                                                                                                                                                                |          |     |
|--------------------------------|----------------------------------------------------------------------------------------------------------------------------------------------------------------------------------------------------------------------------------------------------------------------------------------------------------------------------------------------------------------------------------------------------------------------------------------------------------------------------------------------------------------------------------------------------------------------------------------------------------------------------------------------------------------------------------------------------------------------------------------------------------------------------------------------------------------------------------------------------------------------------------------------------------------------------------------------------------------|----------|-----|
| <i>tet(Q)</i>                  | AGAATCTGCTGTTTGGCAGTGGAGCAACGGAAAAAGTGGCGGCTGTGGATAATGGTGACACCATAACGGACTCTATGGATATAGAGAAACGTAGAGGAATTACTGTCCGGGCTTCTACGACATCTATTATCTGGAATGGAGTGAAATGCAATATCATTGACACTCCG                                                                                                                                                                                                                                                                                                                                                                                                                                                                                                                                                                                                                                                                                                                                                                                        | Y08615   | 100 |
| <i>tet(S)</i>                  | GAAAGCTTACTATACAGTAGCGGAGCAATTAAGAGTTAGGAAGTGTAGATAGCGGTACAACGAAAACGGATACTATGTTTTTGGAAACGCCAGAGAGGTATTACTATTAGACCCGCAATAACATCTTTTCAACGGGAAAAATGTTAAAGTAAATATTGTAGATACTCCT                                                                                                                                                                                                                                                                                                                                                                                                                                                                                                                                                                                                                                                                                                                                                                                      | JX865374 | 100 |
| <i>tet(T)*</i>                 | AAGGTTTTATTATATAAAAGTGGGGCAATTAATAAAATTGGAAGGGTCGATAATGCTACAACGATAACGGATTGATGGAACTTGAAAGAGATAGGGGGATAACTATACGGGGCTTACAGTTTCAATTAATTATAATGATACAAGGTAATATCATAGATACACT                                                                                                                                                                                                                                                                                                                                                                                                                                                                                                                                                                                                                                                                                                                                                                                            | L42544   | 90  |
| <i>aad(A)</i>                  | GTGGATGGCGGCTGAAGCCACACAGTGATATTGATTTGCTGGTTACGGTGACCGTAGGCTTGATGAAAACAACGGCGGAGCTTTGATCAACGACCTTTGGAAACTTCGGCTTCCCCTGGAGAGAGCGAGATTCTCCGCGCTGTAGAAGTACCATTGTTGTGCACGA<br>CGACATCATCCGTGGCGTTATCCAGCCAGCGCAACTGCATTTGGAGAATGGCAGCGCATGTCATTTTCAGAGTTCTTCGAGCCAGCCAGATCGACATTTGATCTGGCTATCTTGCTGACAAAGCGAGAGAACGATGCGTGGCTGGTAGTCCAGCG                                                                                                                                                                                                                                                                                                                                                                                                                                                                                                                                                                                                                          | KC540778 | 95  |
| <i>str(A)</i>                  | CTTGGTGATAACGGCAATTCGGGGAGTACCGGGCGGTGATCTGTCTGGAGCGGATTTGCTCAAAGCGTGGCGGTCATGGGGCAGCAACTTTGGCGTGTTCACAGCCTATCGGTTGATCAATGTCCGTTTGGAGCGAGGCTGTCCGGAATGTTCCGACGCGCCGTTGAT<br>GTGGTGTCCCGCAATGCGCTCAATCCGACTTCTACCAGGACGAGGACAAGAGTACGCGCGAGCTCGATCTTTTGGCTCGTGTGCAACGAGAGCTACCGGTGCGGCTCGACCAAGAGCGCACCGATATGGTTGTTTGGCCATGGTGATCCCTGCATGCCGAATTCATGG<br>TGGACCTAAAACCTTCAATGCACGGGTCTGATCGACCTTTGGCGGCTCGGAACAGCAGATCGCTATGCCGATTTGGCACTCATGATTGCTAACGCCAAGAGAACTGGGACGCGCCAGATGAAGCAGAGCGCGCTTCGCTGTCTTCAATGATTGGGGATCGA<br>AGCCCCGACCGCAACGCGCTTGCCTTCTATCTGCGATTGG                                                                                                                                                                                                                                                                                                                                                                                          | KC495078 | 100 |
| <i>str(B)</i>                  | ATCGTCAAGGGATTGAAACCTATAGAAGACATTGCTGTGAAGTGCAGGAAACGATTTAAACTAGAAATAGATGTTTCTAGCTTTAGAGCCTAAAAAGAGCCCATACCCGGATCAAGAATAATTTGTTTCATGCTTTACACCGCTCAACTAAAGCAGCAATT<br>CACGGCGACTACCAGGCGACCGAAATTCAGCGGAATTAATGGCGAAGCTGTATGCCCATCTGAGGAACCCCTGCCTTCTGCCCTTCTCCGATCCGGGATCGCTTTCAGCTTTGTTTCAGCGGGCGCGGATGATCAAAACGACGGTTGTCAAAGTACTACGCTCC<br>ACGCGCGATTATAGCCGATCAAATGATGAGCAATGCTCGGAACGCTGGGCTACATGGCGATCTGCATCATGAAAACATCATGTTCTCCAGTCCGGCTGGTGGTATAGATCCCGTCCGCTGCTGGTGAAGTGGGCTTTGGCGCCGCAATATGTTCTACGA<br>TCC                                                                                                                                                                                                                                                                                                                                                                                                                                            | KC495078 | 100 |
| <i>sul1</i>                    | TTCCGCACTTCTGAATCTCACCGAGGACTCCTTCTTCGATGAGAGCCGGCGGCTAGACCCCGCCGGCGCTGTACCGCGGCGATCGAAATGCTGCGAGTCCGATCAGACGCTGTTGATGTCGGACCGCCGCGCAGCCATCCGGACGCGAGGCTGTATCGCCGGCCGATG<br>AGATCAGAGCTATTGCGCGCTCTTAGACGCCCTGTCCGATCAGATGCACCGTGTTCATCGACAGCTTCCAAACCGGAAACCCAGCGCTATGCGCTCAAGCGCGGCTGGGCTACCTGAACGATATCCAGGATTCTCCGACCTGCGCTCTATCCCGATATTGCTGAG<br>GCGGACTGCAGGCTGGTGTATGCACTCAGCGCAGCGGGATGGCATCGCCACCCGACCGGTACCTTCGACCCGAAGACGCGCTGACGAGATTGTCGGTTCCTTCGAGGCGGGTTCCGCTTTCGACGGAGCGGGTTCGCGAGCGGCGCTATCCCGATATCCCGAT<br>CGGGATGGGATTTTTCTTGGAGCCCGCACCGGAAACATCGCTGCACGCTGTGCAACCTTCAAAGCTGAAAGTGGCGTGGGGCTTCCGCTATTGGTCTCGGTGTCGGGAAATCTTCTTGGGCGCCACCGTTGGCTTCTGTAAGGATCTGGTCCAGCGAGC<br>CTTGGCGGCAACTTCACGCGATCGCAATGGCGTGAATCGTCCGACCCACGCGCTGGAGATCTGCGAAGCGCAATCACTTCTCGGAAACCTTCGCGAAATTCGCGAGTCCGACGCCAGAGACCGAGGGTTAGATCAT                                                                                                                        | KC170992 | 100 |
| <i>sul2</i>                    | TTATGCATTCCGGTGAAGACGGGACGGCAGATCGGCGCGAGGACCCGCTGGCGACATCATGGATCACATTGCGGCGTCTTTGACGCGCGCATCGCGGCGTACGGGTGCCGATCAAACGCAACCGCTTGTCTTGTATCCCGCATGGGTTTTTTCTGGGGG<br>TGCTCCGAAACCTCGCTCCTGGTGGCGGTTTCGATGAATGGCGCTGCCCTTCGATTTGCCGGTCTTCTGTCTGTTTCGCGCAAATCTTCTCGCGCGCTCACAGCCGCTGGTCCGGGGATGTCGGGGCCGCGACTCGCTGCAGAGCTTCCCGCCGCG<br>CAGGTGGAGCTGACTTCATCCGCACA                                                                                                                                                                                                                                                                                                                                                                                                                                                                                                                                                                                                  | JX566450 | 100 |
| <i>sul3</i>                    | GATCTGGAGCTAACCTATGGCTTTGTTTATTTCAAAGCTTCTGATAAAGACTTACCATCATGGGAGCGGAGATAAGCTGCTCATTTTTAGATGCGTACATGCTGCTGCGAGAGCAGGTGCTAAACGAGATTTACATCTGCCTCCAGTCTTTTACCTAAGAATGATG<br>TCCGTGACAGGCTATTACTTCAACTGTACGCTTCGTAATTTACGAGGAAACGATTTAAACTAGAAATAGATGTTTCTAGCTTTAGAGCCTAAAAAGAGCCCATACCCGGATCAAGAATAATTTGTTTCATGCTTTACACCGCTCAACTAAAGCAGCAATT<br>CTTTCTTAAAAAATCCATCATGGAAGTAAAAACCTCTCCGGATTCGTTTCAACGTTAGTAGCTGCACCAATTCGCTGAACGGAGTGCATCAACACAAGTTTGCAGTCTGATTTTACCAAGCGAGAATAAATCTCAGGATAAGGAAAACTTGAATATCATTAATAAA<br>ATCAACCTTTTGTATGCAAAAATAGGGACTTCAGGTTAAATGATCAACAGAAATAGAAATGCCTTCTTTTAAAGCTTAAATGACGATTTTGAATTTTCCACAACGCCCACTTCAAGTTGATCAGGATTACTGGAAGCGGCTCCCAATCAAT<br>CATCTGCTCCATCTCAACCAATGCAGAGCATGCTAATTTGCTAATCTGATCTAAATAAAGTCCATCCGAAACCACTCGGTGGTATATTAACGATTGCAAAAACTTTGCTC                                                                                                                                                              | CP004058 | 93  |
| <i>erm(A)</i>                  | GTTCAGAACAATCAATACAGAGTCTACACTTGGCTTAGGATGAAAATATAGTGGTGGTACTTTTTGAGCATTTTTATATCCATCTCCACCATAATAGTAAACCCAAAGCTGTTGCGAGATTTTGAATCTTTTCGCAATCCCTTCTCAACGATAAGATAGTATATT<br>TAGCCTGACTTCAAAGGTAATCTTTTGGACAATATCCGACTGATGTTATAAGGAATATTACAWATATCTTATAGTTTATATGTTTTGGGAAGGAAAAATTTAGAATATCCGTTTGAATCACTTTTATATCTCAGAGGGGTTTACCGCTTCTTAGTCACTTGACATAA<br>GCCTCCATCAATTTCTATAGCAGTAAGTATGACTCATTTTTGACTAGCTCTTTGGTAAAAATGTCCTTTTCTGATCC                                                                                                                                                                                                                                                                                                                                                                                                                                                                                                                              | FN435325 | 99  |
| <i>erm(B)</i>                  | AAAACCTACCCGCCATACCACAGATGTTCCAGATAAATATTGGAAGCTATATACGTAATTTGTTTTCAAAATGGGTCAATCGAGAATATCGTCAACTGTTTACTAAAAATCAGTTTCAATCAAGCAATGAAACACGCCAAA                                                                                                                                                                                                                                                                                                                                                                                                                                                                                                                                                                                                                                                                                                                                                                                                                  | HF678446 | 100 |
| <i>erm(C)</i>                  | TAGCAAACCCGATTTCCACGATTAATAAATCTCATTAGCTATACTATCAAAAAAATTTGCGTATTATATCCGTAATGTTATAAGGTATATTACCATATATTTTATAGGATTGGTTTTTAGGAAATTTAACTGCAATATATCCTTGTAAAACTTGGAAATTATC<br>GTGATCAACAAGTTTATTTTCTGTAGTTTTGCATAATTTATGGTCTATTTCAATGGCAGTTACGAAATTAACCTCTTTACTAATTTCAAGGGTAAAAATGGCCTTTTCTGAGCCGATTTT                                                                                                                                                                                                                                                                                                                                                                                                                                                                                                                                                                                                                                                                | JF968527 | 100 |
| <i>erm(F)</i>                  | TCGTTTTACGGGTCAGCACTTACTATATTGATAAAGTGCTAATAAAAGATGCAATAAGACAAGCAATATAAGTAATCAGGATACGGTTTTAGATATTGGGGCAGGCAAGGGGTTTTCTACTGTTCAATTTATAAAAAATCGCAACAATGTTGTTGCTATTGAAAACGA<br>CACAGCTTTGGTTG                                                                                                                                                                                                                                                                                                                                                                                                                                                                                                                                                                                                                                                                                                                                                                     | JQ707297 | 100 |
| <i>bla<sub>CTX-M</sub></i>     | ATGTGCAGCACCAGTAAAGTATGGCCGCGGCGGCTGTGAAGAAAAGTGAAGCGAACCGAACTGTAAATCAGCGAGTTGAGATCAAAAAATCTGACCTTGTAACTATAATCCGATTGCGGAAAAGCACGTCATATGGGACGATGTCAGTGGCTGAGCTTAGC<br>GCGGCCGCGTACAGTACAGCGATAACGTGGCGATGAATAAGCTGATTGCTACGTTGGCGGCCCGGCTAGCGTCAACCGGTTCCGCCGACAGCTGGGAGACGAAACGTTCCGTCTCGACCGTACCAGCCGACGTTAAACACCGCCATCCGGGCGATCCGCGTAT                                                                                                                                                                                                                                                                                                                                                                                                                                                                                                                                                                                                                       | JN194214 | 100 |
| <i>bla<sub>OXA20</sub></i>     | AGAGCGGTGACTACTGGATAGATGAAAATCTTGAATTTACGAAATGAACAAATTTCCATCTAAAGAAGCTTTATCGAAATGAGCTTCTTTTAGGGTAGAGCACCAACCGTGGTTAAAGACTTGATGATTGTCGAAGCCAAACGCGATTGGATACTACGTGCCAA<br>AACAGGCTGGGATGGTCAAAATGGGTTGGTGGGTCGGTTGGGTAGAGTGGCTACAGGCCAGTATTTTTGGCTTAAATATCGACACGCCAAACAGGATGGAAGACCTTCATAAACGAGAGGCAATTCGCGGTGCTATTCTTCAATCCGTCATGCTTT                                                                                                                                                                                                                                                                                                                                                                                                                                                                                                                                                                                                                           | FJ445404 | 100 |
| <i>bla<sub>OXA1</sub></i>      | TCCCACACCAGAAAACAGTTTGAATGCACTAGATATTCAGGTGCCGCTCCGTTATACCAAAGCCTTTTTACTATTAGCTGGTTTTCTTTAGATGCTGACAATTTAATAATAGAGACTTAGAACTCCACTTGATTAAGTCCGGAAATTTAAAGTGGCCT<br>TCCAACCAGAAATTTGCAATGCCACCAGTATTTCTGGTGGCATAGGAAAATTTTTAAGGTAATTTCTGCATTCTACTTCGCCAACTTCTTGGCGATTGTTGA                                                                                                                                                                                                                                                                                                                                                                                                                                                                                                                                                                                                                                                                                       | JQ342831 | 99  |
| <i>bla<sub>OXAII</sub></i>     | AAGAAACGCTACTCGCTGCATCGACATTAAGATACTCATACTTTTTGCACTTGTATGACGCGCTGTTCTGTATGAGTTCAGATTTTTTCGATGGGACGCGGTTAACAGGGGCTTGCAGGCCACAATCAAGACCAAGATTGCGATCAGCAATGCGGAATTTCTAC<br>TGTTTGGGTGATGAGCTATTTGCAAAAGGAAATGGTGTGACAAAAGCTCGGCGTATTTGAAGAAAATCGACTATGGCAACGCCGATCTTCGACAAGTAATGGCGATTACTGGATAGAAGGCGAGCTTGAATCTCGGCGCAGGAGCAATTTGCTCAGGAAAG<br>CTCTATCGTAACGAGCTGCCCTTTCCGGTGAACATCAGCGCTTGGTCAAGGATCTCATGATTGTTGGAAGCCGGTGCCTACTGGAATGCGGTTGCGGTTGAGTGGGTTGAGTGG                                                                                                                                                                                                                                                                                                                                                                                                                                                                                                | KC493654 | 100 |
| <i>bla<sub>OXAIV*</sub></i>    | AGCCGCATATTTAGTCTAGTTTTTATGCAAGCAGCGCTCTCAGAGTCTATTTCTGAAAAATTTGGCGTGGAAATAAAGAAATTTCTAGTGAATCCGTCATGGCGTTTTGTACTTTGTAAAAGTAGTAGCAATTTCTGTACTACAATAATGCGGCACGTGCATCTAC<br>AGCTTATTTCCAGCATCAACATTTCAAAATCTTAATGCTTAAAGTCTTGAACCGGCCATAAAAGTGAACCGGCAAGCCAGAGCCATGAAGCAATGGGAAAAAGACTTAAAGCTAAGGGGCGCTATACAGGTTTCTGCTGT<br>TCCGGTATTCAACAAATTTGCCAGAGAAGTTGGCGAAATAAGAATGCAAAAATACCTTAACCTGTTTCTACGCAACCGCAATATAGGGGGAGGCAATTGACAAATCTGGCTAGAAGGTCAGCTTGAATCTCAGCATTCAATCAAGTTAAATTTTAGAGTCCCTC<br>TACCTGAATAATTTGCCAGCATCAAAAGCAAACCACTAATAGTAAAAGAGGCAATAGTTACAGAAGCAACTCCAGAATATATAGTTCAATTAACCAAACTGGGTATCCGGTGTGGCACAGAATCAAGTCTGGTGTGCTGGTGGGTTGGTTGGGTAGAGAAAGGA<br>ACTGAGGT                                                                                                                                                                                                                                                                             | AF347074 | 100 |
| <i>bla<sub>PSE</sub></i>       | ACCGTATTGAGCCTGATTTAAATGAAGTAAAGTCCGGTATTGAGGGATACGACAACCTCAAGGCAATAGCCAGTACTTTGAATAAAATTTTTATTTGGTTCGCGCTATCTGAAATGAACGAGAAAAAATTAGAGTCTTGGATGGTGAACAATCAAGTCACTGGTAA<br>TTTTACTACGTTCAATTTGCCGGCGGATGGAACATTGCGGATCGCTCAGGTGCTGGCGGATTTGGTGTCTGGAGTATTACAGCAGTTGTGGAGTGAGCATCAAGCCCAATTACGTGGAGCACCTATCTAGCTCAAAACACAGGCTTCAAT                                                                                                                                                                                                                                                                                                                                                                                                                                                                                                                                                                                                                               | JX491633 | 99  |
| <i>bla<sub>TEM</sub></i>       | TCCGCTCATGAGACAATAACCCTGATAAATGCTTCAATAATATTGAAAAAGGAAGAGTATGAGTATTCAACATTTCCGTGTCGCCCTTATCCCTTTTTTGGCGCATTTTGCCTTCTGTTTTTGTCTACCCAGAAACGCTGGTGAAGTAAAAGATGCTGAAGATCAGT<br>TGGGTGCACGAGTGGTTCATATCGAATGGATCTCAACAGCGGTAAGATCTTTGAGAGTTTTCCGCCGGAAGAAGCTTTTCAATGATGAGCAGCTTTTAAAGTTCTGCTATGTTGGTGGGATATCCCGTGTGACGCGCGGCAAGGCAACTCGGTGCGCCGATACAC<br>TATTTCTCAGAAATGCTTGGTGTGACTCACCAGTACAGAAAAGCATCTTACGGATGGCATGACAGTAAGAGAATTTGAGTGTGCCATCAACATGAGTGAATAACACTGCGGCCAATTTACTTCTGACAACGATCGGAGGACCGAAGGACTAACCGCTTTTTGTC<br>ACAATGGGGGATCATGTAACCTCGCTTGGTGGGAAACCGGATGAAAGCTTGAACCGGCAATCAAAAGCAGCGGATGAAAGCTTGAACCGGCAAGCCAGAGCCATGAAGCAATGGGAAAAAGACTTAAAGCTAAGGGGCGCTATACAGGTTTCTGCTGT<br>GACTGGATGGAGGCGGATAAAGTTGACAGGACACTTCTGCGCTCGGCCCTTCCGGCTGGCTGGTATTATGCTGATAAATCTGGAGCCGTTGAGCGTGGTCTCGCGGATCATTTGACGACTGGGGCCAGATGGTAAGCCCGCCGATCGTAGTTATCTACACGACG<br>GGGAGTCAAGCAACTGATGATGAACGAAATAGACAGATCGCTGAGATAGTGCCTCACTGATTAAGCAATTTGGTAACTGTCAGACCAA | GQ343175 | 99  |
| <i>bla<sub>VIMgene-2</sub></i> | TTTTGTCGATATCGCAACGCGAGTCTGTTGGCGCGGCTACCCGTTCAATGGTCTCATTGTCGCTGATGGTGTGATGAGTTGCTTTTTGATTGATACAGCGTGGGTTGCGAAAAACACAGCGGCACTTCTCGCGGAGATTGAAAAGCAATTTGGACTTCCCGTAACGCGT<br>GCAGTCTCCACGAATTTATGACGACCGCTCGCGGCGGTTGATGCTTCCGGCGGCTGGGGTGGCAACGATACGCATCACCGTGCACGCGGCTAGCCGAGGACAGAGGGAAACGAGATTCCACGCACTTCTAGAGGACTCTCATGAGCGGGGACGCACTG<br>CGTTCCGGTCCAGTAGAGCTTCTATCTCTGGTGTGCGCATTT                                                                                                                                                                                                                                                                                                                                                                                                                                                                                                                                                                      | KC417377 | 99  |
| <i>qnr(B)</i>                  | GATCGTGAAGCCAGAAAGGGTGAATTTAGTCTGCTGAGTCTGAAAGATGCCAATTTTTAAAGCTGTGATTTATCCATGGCGAATTTTCCGAAATGCCAGTGCCTGGCAATTGAAATTCGCCACTGCCGCGACAAGGCGCAGATTTCCGCGCGCAAGTTTTATGA<br>ATATGATCACTACTCGACCTGGTTTTGTAGTGCATATATCACTAACACAAATTAAGCTACGCCAATTTTTCGAAAAGTCTGTGGTGGAAAAGTGTGAGCTGTGGAAAACCGTTGGATGGGTGCCAGGTAAGTGGGCGGAGTTCAGTGGTTGAGATCTCTCCGGCGGC<br>GAGTTTTGACTTTGACTGGCGAGCAGCAAACTTACACATTGCGATCTGACCAATTCGGAGTTGGGGGACTTAGATATCCGGGCGTTGATTTACAAAGCGTTAAGTTGGACAACCTACCAGGCATCGT                                                                                                                                                                                                                                                                                                                                                                                                                                                                             | JX259319 | 100 |
| <i>qnr(S)*</i>                 | ACGACATTCGTCAACTGCAAGTTTCAATTGAACAGGGTATATCGAAGGCTGCCACTTTGATGTCGAGATCTTCGTGATGCAAGTTTCAACAAATGCCAATTTGCGATGGCAGCTTCAAGTAATGCCAAATTTGCTACGGTATAGAGTTCCGTGCGTGTGATTTAAAGGT<br>GCCAATTTTCCGGAACAACTTTGCCATCAAGTGAATATCGTACTTTGCTAGCATTATTTCTGGATGTAATCTTCTATGCCAATATGGAGAGGGTTTTGTTTTAGAAAAATGTGAGTTGTTTTGAAAAATCGCTGGGACAGGAACGAACTAGCGGGGTG<br>CATCACTGAAAAGAGTCAGACTTAAAGTCTGAGGTTGTTTTTCCGAAAGATGTCTGGGGGCAAAATTTAGCCCTACAAGGGTGCAAAATTTAA                                                                                                                                                                                                                                                                                                                                                                                                                                                                                                                   | KF362122 | 96  |

|                  |                                                                                                                                                                                                                                                                                                                                                                                                                                                                                                          |          |    |
|------------------|----------------------------------------------------------------------------------------------------------------------------------------------------------------------------------------------------------------------------------------------------------------------------------------------------------------------------------------------------------------------------------------------------------------------------------------------------------------------------------------------------------|----------|----|
|                  |                                                                                                                                                                                                                                                                                                                                                                                                                                                                                                          |          |    |
| <i>fos</i> (A)*  | CTGAATGGGNAANTACTCCGTGNCNCCTTTAAGAGGCAGCCACCAGCGGTTTACGGTGAGCACGGCGTGGTTTATGTTTCATCSTCTTTACCCTATCAGTCCGGGCGGAAAAACAAAAGGGCWCATGCTGGCAATCTCTCAACCACCTGACCCTCGCGGTCAGC<br>GACCTGCAAAAAAGCGTCACCTTCTGGCACGARCTGCTGGGCTTGCCTGTCACGCCCGCTGGAATACCGGGCCCTATCTACCTGCGGCATCTGTGGTCTGCCTGTCTGTACGACGAGGCGGCCAGCATGTGCCGACGAGGAGAGCGACTA                                                                                                                                                                           | EU487198 | 90 |
| <i>van</i> (C2)* | CGCAGGGACGGTGATTTTGGCGCTGATcAGCTGGTACTTTTCTTCAAAATCGaAAAAAGCCGCTACTAATGaAATGGCGTCACAAGCACCAGCAGTCAAAGAGTCTGGTCCAAAATACCGCAACCGATCTCAACACCGGAATATTTTTTGTAGGAGCACTGCGGAAC<br>AATAAGTAAAGGCTTCTTTTAAAGGAGAAGCGATTCTTCAACGCAGGTGACTCTAGTGATCCCTTTTGGAGGAGCCCGCTCATTAGGCTTAAAGAAAAGCTGGAAAGCCATGGGTCTGGATAAAAAGCTTCGATTGTTCTTGTGGTTGGCTTgaTTTTGTCAAGAGAATC<br>GTAGGAGCACTTGTACGCCAATGcCtGCtGCAGCTtGaIGCAACAGCCtTTGTTCATACATAagGGCAGAACCTGCCacCCCCGAGCTTACATAAGgCAGTtCATCaatTTCAAACAATCcTTGGATACTGCCATCTTCCCCG | JX220985 | 99 |

Supplementary Table 3c. Primers and probes used for quantitative PCR.

| Name             | Sequence (5'→3')                 | Amplicon size (bp) | Target                               | Reference  |
|------------------|----------------------------------|--------------------|--------------------------------------|------------|
| Universal 16S    |                                  |                    |                                      |            |
| BACT1369F        | CGGTGAATACGTTTCYCGG              |                    |                                      | (2)        |
| PROK1492R        | GGWTACCTTGTTACGACTT              | 123                | <i>rns</i> gene                      |            |
| TM1389F          | HEX- CTTGTACACAC CGCCCG TC- BHQ1 |                    |                                      |            |
| <i>int1</i>      |                                  |                    |                                      |            |
| intI-F2          | TCGTGCGTCGCCATCACA               | 67                 | Integrase class 1                    | (3)        |
| intI-R2          | GCTTGTCTACGGCACGTTTGA            |                    |                                      |            |
| <i>sul1</i>      |                                  |                    |                                      |            |
| sul1-F           | GACTGCAGGCTGGTGGTTAT             | 105                | Sulfamethazine resistance gene 1     | (1)        |
| sul1-R           | GAAGAACCGCACAAATCTCGT            |                    |                                      |            |
| <i>str</i> (A)   |                                  |                    |                                      |            |
| strA -F          | TATGGTTGTTTGGCATGGTG             |                    | Streptomycin resistance gene locus A | This study |
| strA -R          | TTCTCTTCGGCGTTAGCAAT             |                    |                                      |            |
| <i>str</i> (B)   |                                  |                    |                                      |            |
| strB -F          | ATCGCTTTCAGCTTTGTTT              |                    | Streptomycin resistance gene locus B | (4)        |
| strB -R          | ATGATGCAGATCGCCATGTA             | 143                |                                      |            |
| strB -P          | HEX-ATGCCTCGGAACTGCGT-BHQ1       |                    |                                      |            |
| IncW <i>repA</i> |                                  |                    |                                      |            |
| incW-F           | GGCCATCGTATCAACGAGAT             |                    | Plasmid                              | (1)        |
| incW-R           | ATTGGTGCCTCAAAGTAGC              | 153                | incompatibility group W              |            |
| incW-P           | HEX-AGCTGGCTTAGTCGGCTACA-BHQ1    |                    |                                      |            |
| <i>erm</i> (B)   |                                  |                    |                                      |            |
| ermB -F          | AAAACCTACCCGCATACCA              | 139                | Erythromycin resistance gene locus B | (5)        |
| ermB -R          | TTGGCGTGTTCATTGCTT               |                    |                                      |            |
| <i>erm</i> (F)   |                                  |                    |                                      |            |
| ermF -F          | TCGTTTACGGGTCAGCACTT             | 182                | Erythromycin resistance gene locus F | (5)        |
| ermF -R          | CAACCAAAGCTGTGTCGTTT             |                    |                                      |            |

1. **Marti R, Tien YC, Murray R, Scott A, Sabourin L, Topp E.** 2014. Safely Coupling Livestock and Crop Production Systems: How Rapidly Do Antibiotic Resistance Genes Dissipate in Soil Following a Commercial Application of Swine or Dairy Manure? *Appl Environ Microbiol* **80**:3258-3265.
2. **Suzuki MT, Taylor LT, DeLong EF.** 2000. Quantitative analysis of small-subunit rRNA genes in mixed microbial populations via 5'-nuclease assays. *Applied and Environmental Microbiology* **66**. 4605-4614.
3. **Gaze WH, Zhang L, Abdouslam NA, Hawkey PM, Calvo-Bado L, Royle J, Brown H, Davis S, Kay P, Boxall ABA, Wellington EMH.** 2011. Impacts of anthropogenic activity on the ecology of class 1 integrons and integron-associated genes in the environment. *Isme Journal* **5**:1253-1261.
4. **Walsh F, Ingenfeld A, Zampiccoli M, Hilber-Bodmer M, Frey JE, Duffy B.** 2011. Real-time PCR methods for quantitative monitoring of streptomycin and tetracycline resistance genes in agricultural ecosystems. *J Microbiol Methods* **86**:150-155.
5. **Knapp CW, Zhang W, Sturm BSM, Graham DW.** 2010. Differential fate of erythromycin and beta-lactam resistance genes from swine lagoon waste under different aquatic conditions. *Environmental Pollution* **158**:1506-1512.



Table 3d: Thermocycler conditions for quantification of gene targets.

| qPCR Marker (primer pair/probe)           | PCR Conditions                      |                   |            |                      |        |
|-------------------------------------------|-------------------------------------|-------------------|------------|----------------------|--------|
|                                           | Temperature (°C), Time (min or sec) |                   |            |                      |        |
|                                           | Final primer concn (nM)             | Enzyme Activation | Denaturing | Annealing /Extension | Cycles |
| 16S rRNA (BACT1369F/ PROK1492R/ TM1389)   | 300                                 | 95, 10 min        | 95, 15 s   | 59, 40 s             | 39X    |
| <i>int1</i> (intI-F2/ intI-R2)            | 400                                 | 95, 10 min        | 95, 15 s   | 62, 60 s             | 39X    |
| <i>sul1</i> (sul1-F/ sul1-R)              | 200                                 | 95, 10 min        | 95, 15 s   | 64, 60 s             | 39X    |
| <i>str(A)</i> (strA-F/ strA -R)           | 400                                 | 95, 10 min        | 95, 15 s   | 62, 60 s             | 39X    |
| <i>str(B)</i> (strB -F/ strB -R/ strB -P) | 300                                 | 95, 10 min        | 95, 15 s   | 61, 30 s             | 39X    |
| IncW <i>repA</i> (incW-F/ incW-R/ incW-P) | 300                                 | 95, 10 min        | 95, 15 s   | 61, 30 s             | 39X    |
| <i>erm(B)</i> (ermB -F/ ermB -R)          | 400                                 | 95, 10 min        | 95, 15 s   | 65, 60 s             | 39X    |
| <i>erm(F)</i> (ermF -F/ ermF -R)          | 300                                 | 95, 10 min        | 95, 15 s   | 61, 40 s             | 39X    |

Table S4. Abundance of viable enteric bacteria in soils sampled at vegetable harvest. Soils were fertilized inorganically (I), or with dewatered municipal biosolids (Biosolids) or sewage sludge (Sludge). Plots were sampled in the year of application (2011 for biosolids, 2012 for sludge) and the sludge plots additionally sampled the following year (2013). In cases where not all replicate samples were quantifiable the number of replicates with the indicated result is indicated in brackets. BDL = below detection limit. NT = not tested. D = detected but below the limit of quantification.

| SOIL | Organism†                | Cucumber (N=4) |              | Tomato (N=4)     |             | Pepper (N=4)      |             | Carrot (N=4)  |             | Radish (N=4)     |                     |
|------|--------------------------|----------------|--------------|------------------|-------------|-------------------|-------------|---------------|-------------|------------------|---------------------|
|      |                          | I              | Biosolids    | I                | Biosolids   | I                 | Biosolids   | I             | Biosolids   | I                | Biosolids           |
| 2011 | Total coliforms          | 4.19 ± 3.68    | 4.00 ± 4.05  | 2.56, 2.39, D(2) | 3.52 ± 3.51 | 3.00 ± 2.90, D(1) | 3.30 ± 3.36 | 3.44 ± 3.21   | 3.44 ± 2.99 | 2.27, 2.25, D(2) | 3.91 ± 3.88, BDL(1) |
|      | <i>E. coli</i>           | BDL(4)         | BDL(4)       | BDL(4)           | BDL(4)      | BDL(4)            | BDL(4)      | BDL(4)        | BDL(4)      | BDL(4)           | BDL(4)              |
|      | <i>Enterococcus</i> *    | 12/12          | 11/12        | 1/12             | 0/12        | 1/12              | 0/12        | 8/12          | 6/12        | 5/12             | 4/12                |
|      | Faecal coliforms         | NT             | NT           | NT               | NT          | NT                | NT          | NT            | NT          | NT               | NT                  |
|      | <i>C. perfringens</i>    | NT             | NT           | NT               | NT          | NT                | NT          | NT            | NT          | NT               | NT                  |
|      | <i>Aeromonas</i> sp.     | NT             | NT           | NT               | NT          | NT                | NT          | NT            | NT          | NT               | NT                  |
|      | <i>Salmonella</i> sp.    | BDL(4)         | BDL(4)       | BDL(4)           | BDL(4)      | BDL(4)            | BDL(4)      | BDL(4)        | BDL(4)      | BDL(4)           | BDL(4)              |
|      | <i>Yersinia</i> sp.      | NT             | NT           | NT               | NT          | NT                | NT          | NT            | NT          | NT               | NT                  |
|      | <i>Campylobacter</i> sp. | BDL(4)         | BDL(4)       | BDL(4)           | BDL(4)      | BDL(4)            | BDL(4)      | BDL(4)        | BDL(4)      | BDL(4)           | BDL(4)              |
|      | <i>Listeria</i> sp.      | BDL(4)         | BDL(4)       | BDL(4)           | BDL(4)      | BDL(4)            | BDL(4)      | BDL(4)        | BDL(4)      | BDL(4)           | BDL(4)              |
| SOIL | Organism†                | Tomato (N=4)   |              | Carrot (N=4)     |             | Radish (N=4)      |             | Lettuce (N=4) |             |                  |                     |
|      |                          | I              | Sludge       | I                | Sludge      | I                 | Sludge      | I             | Sludge      |                  |                     |
| 2012 | Total coliforms          | 3.50 ± 3.35    | 3.32 ± 2.93  | 3.47 ± 2.43      | 3.52 ± 3.43 | 2.97 ± 2.17       | 3.43 ± 3.41 | 4.04 ± 3.83   | 3.57 ± 3.39 |                  |                     |
|      | <i>E. coli</i>           | BDL(4)         | D(1), BDL(3) | BDL(4)           | BDL(4)      | BDL(4)            | BDL(4)      | BDL(4)        | BDL(4)      |                  |                     |
|      | <i>Enterococcus</i> *    | 2/4            | 2/4          | 4/4              | 4/4         | 3/4               | 1/4         | 4/4           | 4/4         |                  |                     |

|                          |                    |              |              |                    |              |                    |              |              |
|--------------------------|--------------------|--------------|--------------|--------------------|--------------|--------------------|--------------|--------------|
| Faecal coliforms         | BDL(4)             | D(3), BDL(1) | D(3), BDL(1) | D(3), BDL(1)       | D(1), BDL(3) | 2.70, D(3)         | D(1), BDL(3) | D(4)         |
| <i>C. perfringens</i>    | BDL(4)             | D(1), BDL(3) | D(1), BDL(3) | 2.71, D(3)         | BDL(4)       | 2.90 ± 1.88, D(1)  | BDL(4)       | D(4)         |
| <i>Aeromonas</i> sp.     | 3.06, D(2), BDL(1) | 2.88, D(3)   | 2.99, D(3)   | 2.62, D(2), BDL(1) | D(3), BDL(1) | 2.85, D(1), BDL(2) | D(2), BDL(2) | D(3), BDL(1) |
| <i>Salmonella</i> sp.    | BDL(4)             | BDL(4)       | BDL(4)       | BDL(4)             | BDL(4)       | BDL(4)             | BDL(4)       | BDL(4)       |
| <i>Yersinia</i> sp.      | 3.68 ± 3.50        | 3.42 ± 2.87  | 3.36 ± 2.84  | 3.26 ± 2.69        | D(4)         | 3.06, D(3)         | BDL(4)       | BDL(4)       |
| <i>Campylobacter</i> sp. | BDL(4)             | BDL(4)       | BDL(4)       | BDL(4)             | BDL(4)       | BDL(4)             | BDL(4)       | BDL(4)       |
| <i>Listeria</i> sp.      | BDL(4)             | BDL(4)       | BDL(4)       | BDL(4)             | BDL(4)       | BDL(4)             | BDL(4)       | BDL(4)       |

| SOIL            | Organism <sup>†</sup> | Radish (N=8)              |                   | Lettuce            |                    | Carrots (N=8)             |                   |
|-----------------|-----------------------|---------------------------|-------------------|--------------------|--------------------|---------------------------|-------------------|
|                 |                       | Control                   | Sludge            | Control (N=8)      | Sludge (N=7)       | Control                   | Sludge            |
| 2013            | Total coliforms       | 3.11 ± 2.82               | 3.18 ± 3.16       | 3.80 ± 3.58        | 3.97 ± 4.08        | 3.17 ± 3.05, D(1)         | 3.06 ± 2.75, D(3) |
|                 | Fecal coliforms       | D(1), BDL(7)              | BDL(8)            | D(4), BDL(4)       | 2.86, D(4), BDL(2) | D(4), BDL(4)              | D(5), BDL(3)      |
|                 | <i>E. coli</i>        | D(2), BDL(6)              | BDL(8)            | D(1), BDL(6)       | BDL(7)             | BDL(8)                    | BDL(8)            |
|                 | <i>Enterococcus</i>   | D(1), BDL(7)              | D(1), BDL(7)      | 2.64, D(4), BDL(2) | 2.81, D(2), BDL(4) | BDL(8)                    | BDL(8)            |
|                 | <i>Aeromonas</i>      | D(1), BDL(7)              | D(3), BDL(5)      | 2.97 ± 2.70, D(4)  | 3.65 ± 3.80, D(1)  | 3.27 ± 3.09               | 3.48 ± 3.10       |
|                 | <i>C. perfringens</i> | D(2), BDL(6)              | 2.74 ± 2.06, D(4) | D(3), BDL(5)       | 2.60, D(6)         | D(2), BDL(6)              | 2.84 ± 2.23, D(4) |
|                 | <i>Yersinia</i>       | 3.66 ± 3.52, D(4), BDL(1) | BDL(8)            | D(4), BDL(4)       | 2.64, D(6)         | 3.22 ± 2.92, D(2), BDL(1) | 3.09 ± 2.84, D(2) |
|                 | <i>Campylobacter</i>  | BDL(8)                    | BDL(8)            | BDL(8)             | BDL(7)             | BDL(8)                    | BDL(8)            |
|                 | <i>Salmonella</i>     | 0/8                       | 0/8               | 0/8                | 0/7                | 0/8                       | 0/8               |
| <i>Listeria</i> | 0/8                   | 0/8                       | 0/8               | 0/7                | 0/8                | 0/8                       |                   |

<sup>†</sup> Log10 CFU/g wet weight. \* Organism was enumerated by enrichment, with the number of positive enrichments indicated.

Table S5. Abundance of viable enteric bacteria on vegetables at harvest. Soils were fertilized inorganically (I), or with dewatered municipal biosolids (Biosolids) or sewage sludge (Sludge). Plots were sampled in the year of application (2011 for biosolids, 2012 for sludge) and the sludge plots additionally sampled the following year (2013). Significant differences for fertilizer treatment for a given crop is indicated in bold. NA = not analyzed in that particular year. BDL = below detection limit.

**VEGETABLES**

| Organism†                | Cucumber (N=4)    |           | Tomato (N=4) |            | Pepper (N=4) |             | Carrot (N=4) |             | Radish (N=4)       |           |
|--------------------------|-------------------|-----------|--------------|------------|--------------|-------------|--------------|-------------|--------------------|-----------|
|                          | I                 | Biosolids | I            | Biosolids  | I            | Biosolids   | I            | Biosolids   | I                  | Biosolids |
| Total coliforms          | 3.26 ± 3.33, D(1) | D(4)      | 1.46, D(3)   | 1.45, D(3) | 4.44 ± 4.38  | 4.37 ± 4.35 | 4.29 ± 4.28  | 3.71 ± 3.45 | 1.78, 1.30, D, BDL | D(4)      |
| <i>E. coli</i>           | BDL(4)            | BDL(4)    | BDL(4)       | BDL(4)     | BDL(4)       | BDL(4)      | BDL(4)       | BDL(4)      | BDL(4)             | BDL(4)    |
| <i>Enterococcus</i> *    | 1/12              | 1/12      | 0/12         | 0/12       | 5/12         | 1/12        | 0/12         | 0/12        | 1/12               | 1/12      |
| Fecal coliforms          | NT                | NT        | NT           | NT         | NT           | NT          | NT           | NT          | NT                 | NT        |
| <i>C. perfringens</i>    | NT                | NT        | NT           | NT         | NT           | NT          | NT           | NT          | NT                 | NT        |
| <i>Aeromonas</i> sp.     | NT                | NT        | NT           | NT         | NT           | NT          | NT           | NT          | NT                 | NT        |
| <i>Salmonella</i> sp.    | BDL(4)            | BDL(4)    | BDL(4)       | BDL(4)     | BDL(4)       | BDL(4)      | BDL(4)       | BDL(4)      | BDL(4)             | BDL(4)    |
| <i>Yersinia</i> sp.      | NT                | NT        | NT           | NT         | NT           | NT          | NT           | NT          | NT                 | NT        |
| <i>Campylobacter</i> sp. | BDL(4)            | BDL(4)    | BDL(4)       | BDL(4)     | BDL(4)       | BDL(4)      | BDL(4)       | BDL(4)      | BDL(4)             | BDL(4)    |
| <i>Listeria</i> sp.      | BDL(4)            | BDL(4)    | BDL(4)       | BDL(4)     | BDL(4)       | BDL(4)      | BDL(4)       | BDL(4)      | BDL(4)             | BDL(4)    |

**VEGETABLES**

| Organism†                | Tomato (N=4) |             | Carrot (N=4)      |              | Radish (N=4) |              | Lettuce (N=4)     |                    |
|--------------------------|--------------|-------------|-------------------|--------------|--------------|--------------|-------------------|--------------------|
|                          | I            | Sludge      | I                 | Sludge       | I            | Sludge       | I                 | Sludge             |
| Total coliforms          | 3.44 ± 3.21  | 2.89 ± 2.33 | 3.70 ± 3.54       | 3.48 ± 3.38  | 2.75 ± 2.20  | 2.92 ± 2.72  | 3.24 ± 2.77       | 3.53 ± 3.57        |
| <i>E. coli</i>           | BDL(4)       | BDL(4)      | BDL(4)            | BDL(4)       | BDL(4)       | BDL(4)       | BDL(4)            | BDL(4)             |
| <i>Enterococcus</i> *    | 2/4          | 2/4         | 0/4               | 0/4          | 1/4          | 1/4          | 4/4               | 4/4                |
| Fecal coliforms          | BDL(4)       | BDL(4)      | D(1), BDL(3)      | D(2), BDL(2) | BDL(4)       | BDL(4)       | 2.26 ± 2.49, D(1) | 4.04, 3.88, BDL(2) |
| <i>C. perfringens</i>    | BDL(4)       | BDL(4)      | BDL(4)            | BDL(4)       | BDL(4)       | BDL(4)       | BDL(4)            | BDL(4)             |
| <i>Aeromonas</i> sp.     | D(1), BDL(3) | BDL(4)      | BDL(4)            | D(1), BDL(3) | BDL(4)       | D(1), BDL(3) | D(1), BDL(3)      | BDL(4)             |
| <i>Salmonella</i> sp.    | BDL(4)       | BDL(4)      | BDL(4)            | BDL(4)       | BDL(4)       | BDL(4)       | BDL(4)            | BDL(4)             |
| <i>Yersinia</i> sp.      | 2.98 ± 2.88  | 2.69 ± 1.62 | 3.19 ± 2.94, D(1) | 2.93, D(3)   | 2.67 ± 2.34  | 2.80 ± 2.50  | BDL(4)            | BDL(4)             |
| <i>Campylobacter</i> sp. | BDL(4)       | BDL(4)      | BDL(4)            | BDL(4)       | BDL(4)       | BDL(4)       | BDL(4)            | BDL(4)             |
| <i>Listeria</i> sp.      | BDL(4)       | BDL(4)      | BDL(4)            | BDL(4)       | BDL(4)       | BDL(4)       | BDL(4)            | BDL(4)             |

**VEGETABLES**

| Organism†             | Radish (N=8)              |                           | Lettuce                  |                    | Carrots (N=8)             |                          |
|-----------------------|---------------------------|---------------------------|--------------------------|--------------------|---------------------------|--------------------------|
|                       | Control                   | Sludge                    | Control (N=8)            | Sludge (N=7)       | Control                   | Sludge                   |
| Total coliforms       | 2.72 ± 2.43, D(1)         | 2.82 ± 2.43, D(3)         | 3.27 ± 3.16              | 3.07 ± 3.02        | 2.49 ± 2.47, D(6)         | 2.56 ± 2.44              |
| Fecal coliforms       | 2.05, BDL(6)              | D(1), BDL(7)              | D(1), BDL(6)             | BDL(8)             | D(4), BDL(4)              | 2.13, D(3), BDL(4)       |
| <i>E. coli</i>        | BDL(7)                    | BDL(8)                    | BDL(8)                   | BDL(8)             | BDL(8)                    | BDL(8)                   |
| <i>Enterococcus</i>   | BDL(7)                    | BDL(8)                    | 2.53, 2.55, D(3), BDL(2) | 2.64 ± 2.60, D(1)  | BDL(8)                    | BDL(8)                   |
| <i>Aeromonas</i>      | 2.61 ± 2.45, D(2)         | 2.02 ± 1.28, D(2), BDL(3) | BDL(7)                   | 3.04, 2.87, BDL(6) | 2.08 ± 1.48, D(3), BDL(1) | 2.77, 2.35, D(5), BDL(1) |
| <i>C. perfringens</i> | BDL(7)                    | BDL(8)                    | BDL(7)                   | BDL(8)             | BDL(8)                    | D(3), BDL(5)             |
| <i>Yersinia</i>       | 2.76 ± 2.71, D(2), BDL(2) | 1.90, D(2), BDL(5)        | 2.88 ± 2.57, D(1)        | 3.23 ± 3.27, D(1)  | 2.66, 2.54, D(5)          | 2.54 ± 2.59, D(4)        |
| <i>Campylobacter</i>  | BDL(7)                    | BDL(8)                    | BDL(7)                   | BDL(8)             | BDL(8)                    | BDL(8)                   |
| <i>Salmonella</i>     | 0/8                       | 0/8                       | 0/8                      | 0/7                | 0/8                       | 0/8                      |
| <i>Listeria</i>       | 0/8                       | 0/8                       | 0/8                      | 0/7                | 0/8                       | 0/8                      |

† Log10 CFU/g wet weight. \* Organism was enumerated by enrichment, with the number of positive enrichments indicated.

Table S6. Abundance of antibiotic resistant total coliform bacteria in soils at harvest time. Soils were fertilized inorganically (I), or with dewatered municipal biosolids (Biosolids) or sewage sludge (Sludge). Plots were sampled in the year of application (2011 for biosolids, 2012 for sludge) and the sludge plots additionally sampled the following year (2013). Samples from biosolids-treated plots that are significantly different from controls are highlighted in bold. In cases where not all replicate samples were quantifiable the number of replicates with the indicated result is indicated in brackets. BDL = below detection limit. NT = not tested. D = detected but below the limit of quantification.

| SOIL              | Vegetable Crop                       |              |                  |                  |                   |                          |                           |                   |                    |                     |
|-------------------|--------------------------------------|--------------|------------------|------------------|-------------------|--------------------------|---------------------------|-------------------|--------------------|---------------------|
|                   | Cucumber (N=4)                       |              | Tomato (N=4)     |                  | Pepper (N=4)      |                          | Carrot (N=4)              |                   | Radish (N=4)       |                     |
|                   | I                                    | Biosolids    | I                | Biosolids        | I                 | Biosolids                | I                         | Biosolids         | I                  | Biosolids           |
|                   | Log10 CFU/g wet weight (Mean ± S.D.) |              |                  |                  |                   |                          |                           |                   |                    |                     |
| Control           | 4.19 ± 3.68                          | 4.00 ± 4.05  | 2.56, 2.39, D(2) | 3.52 ± 3.51      | 3.00 ± 2.90, D(1) | 3.30 ± 3.36              | 3.44 ± 3.21               | 3.44 ± 2.99       | 2.27, 2.25, D(2)   | 3.91 ± 3.88, BDL(1) |
|                   | Percent Resistance (Mean ± S.D.)     |              |                  |                  |                   |                          |                           |                   |                    |                     |
| Amikacin          | D(1), BDL(3)                         | D(1), BDL(3) | D(1), BDL(3)     | D(2), BDL(2)     | D(1), BDL(3)      | D(1), BDL(3)             | BDL(4)                    | D(2), BDL(2)      | 13.8, 16.2, D, BDL | 16.2, BDL(3)        |
| Augmentin         | 5.6 ± 3.1, D(1)                      | 46.4 ± 77.6  | D(3), BDL(1)     | D(2), BDL(2)     | BDL(4)            | 8.2, D(3)                | D(4)                      | D(4)              | D(2), BDL(2)       | 4.3, 12.3, D(2)     |
| Ampicillin        | 8.6, D(3)                            | 11.1, D(3)   | D(2), BDL(2)     | 42.2, 56.6, D(2) | D(4)              | 28.0, D(3)               | 115.8, 31.9, D(1), BDL(1) | 73.2 ± 7.76, D(1) | D(4)               | 46.1 ± 18.3, D(1)   |
| Cefotaxime        | BDL(4)                               | BDL(4)       | BDL(4)           | BDL(4)           | BDL(4)            | BDL(4)                   | BDL(4)                    | BDL(4)            | BDL(4)             | BDL(4)              |
| Cefoxitin         | 23.5 ± 22.4                          | 119 ± 170    | 46.3, D(3)       | 18.8, 45.5, D(2) | D(3), BDL(1)      | 15.3, 44.9, D(1), BDL(1) | D(4)                      | 376.7, D(3)       | 11.9, D(2), BDL(1) | BDL(4)              |
| Ceftiofur         | BDL(4)                               | D(1), BDL(3) | BDL(4)           | BDL(4)           | BDL(4)            | BDL(4)                   | BDL(4)                    | BDL(4)            | BDL(4)             | BDL(4)              |
| Chloramphenicol   | BDL(4)                               | BDL(4)       | BDL(4)           | BDL(4)           | BDL(4)            | BDL(4)                   | BDL(4)                    | BDL(4)            | D(1), BDL(3)       | D(1), BDL(3)        |
| Ciprofloxacin     | BDL(4)                               | BDL(4)       | BDL(4)           | BDL(4)           | BDL(4)            | BDL(4)                   | BDL(4)                    | BDL(4)            | BDL(4)             | BDL(4)              |
| Gentamycin        | 63.3 ± 27.3                          | 128 ± 50.5   | 27.0, 68.8, D(2) | 57.5 ± 23.4      | D(4)              | 78.5 ± 54.8, D(1)        | 80.8 ± 51.8               | 141 ± 59.0        | 80.9 ± 13.8, D(1)  | 82.5 ± 17.8         |
| Nitrofurantoin    | BDL(4)                               | BDL(4)       | BDL(4)           | BDL(4)           | BDL(4)            | BDL(4)                   | BDL(4)                    | BDL(4)            | BDL(4)             | BDL(4)              |
| Norfloxacin       | BDL(4)                               | BDL(4)       | BDL(4)           | BDL(4)           | BDL(4)            | BDL(4)                   | BDL(4)                    | BDL(4)            | BDL(4)             | BDL(4)              |
| Sulfamethoxazole  | BDL(4)                               | D(1), BDL(3) | BDL(4)           | BDL(4)           | BDL(4)            | BDL(4)                   | BDL(4)                    | BDL(4)            | BDL(4)             | BDL(4)              |
| Tetracycline      | BDL(4)                               | D(2), BDL(2) | BDL(4)           | BDL(4)           | BDL(4)            | BDL(4)                   | BDL(4)                    | BDL(4)            | BDL(4)             | BDL(4)              |
| Trimethoprim      | BDL(4)                               | D(1), BDL(3) | BDL(4)           | BDL(4)           | BDL(4)            | BDL(4)                   | BDL(4)                    | BDL(4)            | BDL(4)             | BDL(4)              |
| Co-trimoxazole    | BDL(4)                               | D(1), BDL(3) | BDL(4)           | BDL(4)           | BDL(4)            | BDL(4)                   | BDL(4)                    | BDL(4)            | BDL(4)             | BDL(4)              |
| Chlortetracycline | 12.9 ± 11.6, D(1)                    | D(4)         | BDL(4)           | D(1), BDL(3)     | BDL(4)            | BDL(4)                   | BDL(4)                    | D(1), BDL(3)      | 17.0, BDL(3)       | BDL(4)              |

  

| SOIL              | Tomato (N=4)                     |                                      | Carrot (N=4)       |                          | Radish (N=4)      |                     | Lettuce (N=4)        |                          |
|-------------------|----------------------------------|--------------------------------------|--------------------|--------------------------|-------------------|---------------------|----------------------|--------------------------|
|                   | I                                | Sludge                               | I                  | Sludge                   | I                 | Sludge              | I                    | Sludge                   |
|                   |                                  | Log10 CFU/g wet weight (Mean ± S.D.) |                    |                          |                   |                     |                      |                          |
| Control           | 2.64, 2.86, D(2)                 | 2.96 ± 0.16, D(1)                    | 2.68, 3.46, D(2)   | 3.10 ± 0.27              | 2.72 ± 0.12, D(1) | 3.20 ± 0.49         | 3.52 ± 0.49, D(1)    | 3.19 ± 0.13              |
|                   | Percent Resistance (Mean ± S.D.) |                                      |                    |                          |                   |                     |                      |                          |
| Amikacin          | D(2), BDL(2)                     | BDL(4)                               | BDL(4)             | BDL(4)                   | D(1), BDL(3)      | 30.4, D(2), BDL(1)  | BDL(4)               | D(1), BDL(3)             |
| Augmentin         | D(3), BDL(1)                     | D(4)                                 | D(3)               | 67.6 ± 24.0, D(1)        | D(3), BDL(1)      | 10.1, D(3)          | 131.4, 70.7, D(2)    | 46.8, 67.1, D(2)         |
| Ampicillin        | D(4)                             | 54.5, D(2), BDL(1)                   | D(3), BDL(1)       | 90.1, D(2), BDL(1)       | D(2), BDL(2)      | D(4)                | 103.5 ± 37.0, BDL(1) | 37.1, 28.6, D(2)         |
| Cefotaxime        | BDL(4)                           | D(1), BDL(3)                         | BDL(4)             | BDL(4)                   | BDL(4)            | BDL(4)              | BDL(4)               | BDL(4)                   |
| Cefoxitin         | D(4)                             | 87.5, 35.3, D(2)                     | D(3), BDL(1)       | 57.6 ± 21.7, D(1)        | D(4)              | 32.1 ± 23.6, D(1)   | 41.4, D(3)           | 43.2 ± 11.2              |
| Ceftiofur         | BDL(4)                           | D(1), BDL(3)                         | BDL(4)             | BDL(4)                   | BDL(4)            | BDL(4)              | BDL(4)               | BDL(4)                   |
| Chloramphenicol   | BDL(4)                           | D(1), BDL(3)                         | BDL(4)             | BDL(4)                   | BDL(4)            | D(1), BDL(3)        | BDL(4)               | BDL(4)                   |
| Ciprofloxacin     | BDL(4)                           | BDL(4)                               | BDL(4)             | BDL(4)                   | BDL(4)            | BDL(4)              | BDL(4)               | BDL(4)                   |
| Gentamycin        | D(3), BDL(1)                     | D(1), BDL(3)                         | 50.0, D(1), BDL(2) | 44.8 ± 37.7, BDL(1)      | D(4)              | 49.3 ± 25.4, D(1)   | 68.6, 153.4, D(2)    | 32.8 ± 13.0, D(1)        |
| Nitrofurantoin    | BDL(4)                           | BDL(4)                               | BDL(4)             | BDL(4)                   | D(1), BDL(3)      | BDL(4)              | BDL(4)               | D(1), BDL(3)             |
| Norfloxacin       | BDL(4)                           | BDL(4)                               | BDL(4)             | BDL(4)                   | BDL(4)            | BDL(4)              | BDL(4)               | BDL(4)                   |
| Sulfamethoxazole  | BDL(4)                           | D(1), BDL(3)                         | BDL(4)             | BDL(4)                   | BDL(4)            | BDL(4)              | BDL(4)               | D(2), BDL(2)             |
| Tetracycline      | BDL(4)                           | BDL(4)                               | BDL(4)             | BDL(4)                   | BDL(4)            | D(2), BDL(2)        | BDL(4)               | BDL(4)                   |
| Trimethoprim      | BDL(4)                           | BDL(4)                               | BDL(4)             | BDL(4)                   | BDL(4)            | D(2), BDL(2)        | BDL(4)               | BDL(4)                   |
| Co-trimoxazole    | BDL(4)                           | D(1), BDL(3)                         | BDL(4)             | BDL(4)                   | BDL(4)            | BDL(4)              | BDL(4)               | D(2), BDL(2)             |
| Chlortetracycline | BDL(4)                           | D(3), BDL(1)                         | 91.7, D(1), BDL(2) | 53.6, 85.4, D(1), BDL(1) | D(3), BDL(1)      | 30.0 ± 37.1, BDL(1) | D(2), BDL(2)         | 58.6, 35.4, D(1), BDL(1) |

| Antibiotic        | Carrot (N=8)                         |                    | Radish (N=8) |              | Lettuce (N=8)            |                           |
|-------------------|--------------------------------------|--------------------|--------------|--------------|--------------------------|---------------------------|
|                   | I                                    | Sludge             | I            | Sludge       | I                        | Sludge                    |
|                   | Log10 CFU/g wet weight (Mean ± S.D.) |                    |              |              |                          |                           |
| Control           | 3.31 ± 0.288                         | 3.47 ± 0.320       | 2.60, D(7)   | 3.45, D(7)   | 3.72 ± 0.336             | 3.82 ± 0.410, BDL(1)      |
|                   | Percent Resistance (Mean ± S.D.)     |                    |              |              |                          |                           |
| Amikacin          | D(2), BDL(6)                         | D(2), BDL(6)       | D(1), BDL(3) | BDL(8)       | 12.9 ± 7.1, D(1), BDL(3) | BDL(8)                    |
| Augmentin         | 66.9 ± 22.0, D(1)                    | 80.0 ± 10.4        | D(3), BDL(1) | D(4), BDL(4) | 41.0 ± 19.3, D(1)        | 36.9 ± 20.4, BDL(1)       |
| Ampicillin        | 46.4 ± 16.3, D(1)                    | <b>79.2 ± 15.0</b> | D(2), BDL(2) | D(3), BDL(5) | 19.0 ± 20.0, D(6)        | 24.7 ± 11.2, D(1), BDL(2) |
| Cefotaxime        | BDL(8)                               | BDL(8)             | BDL(4)       | BDL(8)       | BDL(8)                   | BDL(8)                    |
| Cefoxitin         | 36.5 ± 17.1, D(3)                    | 4.70, D(7)         | D(4)         | D(3), BDL(5) | 58.6 ± 23.9, D(1)        | 41.0 ± 26.4, D(1), BDL(1) |
| Ceftiofur         | 103 ± 14.7                           | 104 ± 20.8         | BDL(4)       | D(7), BDL(1) | 32.3 ± 36.7, BDL(5)      | 52.6 ± 31.0, BDL(2)       |
| Chloramphenicol   | BDL(8)                               | BDL(8)             | BDL(4)       | BDL(8)       | BDL(8)                   | BDL(8)                    |
| Ciprofloxacin     | BDL(8)                               | BDL(8)             | BDL(4)       | BDL(8)       | BDL(8)                   | BDL(8)                    |
| Gentamycin        | 36.3 ± 10.0, D(3), BDL(1)            | 41.2 ± 19.7        | D(4)         | D(3), BDL(5) | 31.6 ± 21.0, BDL(1)      | 12.0 ± 5.6, D(1), BDL(4)  |
| Nitrofurantoin    | BDL(8)                               | BDL(8)             | D(1), BDL(3) | BDL(8)       | BDL(8)                   | BDL(8)                    |
| Norfloxacin       | BDL(8)                               | BDL(8)             | BDL(4)       | BDL(8)       | BDL(8)                   | BDL(8)                    |
| Sulfamethoxazole  | BDL(8)                               | BDL(8)             | BDL(4)       | BDL(8)       | BDL(8)                   | BDL(8)                    |
| Tetracycline      | BDL(8)                               | BDL(8)             | BDL(4)       | BDL(8)       | BDL(8)                   | BDL(8)                    |
| Trimethoprim      | BDL(8)                               | BDL(8)             | BDL(4)       | BDL(8)       | BDL(8)                   | BDL(8)                    |
| Co-trimoxazole    | BDL(8)                               | BDL(8)             | BDL(4)       | BDL(8)       | BDL(8)                   | BDL(8)                    |
| Chlortetracycline | D(1), BDL(7)                         | BDL(8)             | D(3), BDL(1) | BDL(8)       | BDL(8)                   | BDL(8)                    |

2013



Table S7. Abundance of antibiotic resistant coliform bacteria on vegetables at harvest. Soils were fertilized inorganically (I), or with dewatered municipal biosolids (Biosolids) or sewage sludge (Sludge). Plots were sampled in the year of application (2011 for biosolids, 2012 for sludge) and the sludge plots additionally sampled the following year (2013). Significant differences for fertilizer treatment for a given crop is indicated with an asterisk. NT = not tested in that particular year.

| VEGETABLES                           |                   | Vegetable Crop |              |              |              |                 |                     |                   |                    |                    |         |           |  |
|--------------------------------------|-------------------|----------------|--------------|--------------|--------------|-----------------|---------------------|-------------------|--------------------|--------------------|---------|-----------|--|
| Antibiotic                           | Cucumber (N=4)    |                | Tomato (N=4) |              | Pepper (N=4) |                 | Carrot (N=4)        |                   | Radish (N=4)       |                    | Lettuce |           |  |
|                                      | I                 | Biosolids      | I            | Biosolids    | I            | Biosolids       | I                   | Biosolids         | I                  | Biosolids          | I       | Biosolids |  |
| Log10 CFU/g wet weight (Mean ± S.D.) |                   |                |              |              |              |                 |                     |                   |                    |                    |         |           |  |
| Control†                             | 3.26 ± 3.33, D(1) | D(4)           | 1.46, D(3)   | 1.45, D(3)   | 4.44 ± 4.38  | 4.37 ± 4.35     | 4.29 ± 4.28         | 3.71 ± 3.45       | 1.78, 1.30, D, BDL | D(4)               | NT      | NT        |  |
| Percent Resistance (Mean ± S.D.)     |                   |                |              |              |              |                 |                     |                   |                    |                    |         |           |  |
| Amikacin                             | BDL(4)            | (D1),BDL(3)    | BDL(4)       | D(2), BDL(2) | D(3), BDL(1) | BDL(4)          | D(1), BDL(3)        | D(1), BDL(3)      | 13.8, D(2), BDL    | 13.8, 16.2, BDL(2) | NT      | NT        |  |
| Augmentin                            | 100, BDL(3)       | BDL(4)         | BDL(4)       | BDL(4)       | BDL(4)       | BDL(4)          | 53.9 ± 40.6, D(1)   | 92.0 ± 66.9, D(1) | BDL(4)             | BDL(4)             | NT      | NT        |  |
| Ampicillin                           | 64.6, BDL(3)      | BDL(4)         | BDL(4)       | BDL(4)       | D(1), BDL(3) | 3.3, 12.4, D(2) | 61.5 ± 41.3, BDL(1) | 39.6 ± 29.0, D(1) | BDL(4)             | BDL(4)             | NT      | NT        |  |
| Cefotaxime                           | BDL(4)            | BDL(4)         | BDL(4)       | BDL(4)       | BDL(4)       | BDL(4)          | BDL(4)              | BDL(4)            | BDL(4)             | BDL(4)             | NT      | NT        |  |
| Cefoxitin                            | 118, BDL(3)       | D(1), BDL(3)   | BDL(4)       | D(1), BDL(3) | 11.4, BDL(3) | BDL(4)          | 80.0 ± 115, D(1)    | 114 ± 66.0        | D(1), BDL(3)       | BDL(4)             | NT      | NT        |  |
| Ceftiofur                            | BDL(4)            | BDL(4)         | BDL(4)       | BDL(4)       | BDL(4)       | BDL(4)          | BDL(4)              | BDL(4)            | BDL(4)             | BDL(4)             | NT      | NT        |  |
| Chloramphenicol                      | BDL(4)            | BDL(4)         | BDL(4)       | BDL(4)       | BDL(4)       | BDL(4)          | BDL(4)              | BDL(4)            | BDL(4)             | BDL(4)             | NT      | NT        |  |
| Ciprofloxacin                        | BDL(4)            | BDL(4)         | BDL(4)       | BDL(4)       | BDL(4)       | BDL(4)          | BDL(4)              | BDL(4)            | BDL(4)             | BDL(4)             | NT      | NT        |  |
| Gentamycin                           | BDL(4)            | BDL(4)         | BDL(4)       | BDL(4)       | BDL(4)       | BDL(4)          | BDL(4)              | BDL(4)            | BDL(4)             | BDL(4)             | NT      | NT        |  |
| Nitrofurantoin                       | BDL(4)            | BDL(4)         | BDL(4)       | BDL(4)       | BDL(4)       | BDL(4)          | BDL(4)              | BDL(4)            | BDL(4)             | BDL(4)             | NT      | NT        |  |
| Norfloxacin                          | BDL(4)            | BDL(4)         | BDL(4)       | BDL(4)       | BDL(4)       | BDL(4)          | BDL(4)              | BDL(4)            | BDL(4)             | BDL(4)             | NT      | NT        |  |
| Sulfamethoxazole                     | BDL(4)            | BDL(4)         | BDL(4)       | BDL(4)       | BDL(4)       | BDL(4)          | BDL(4)              | BDL(4)            | BDL(4)             | BDL(4)             | NT      | NT        |  |
| Tetracycline                         | BDL(4)            | BDL(4)         | BDL(4)       | BDL(4)       | BDL(4)       | BDL(4)          | BDL(4)              | BDL(4)            | BDL(4)             | BDL(4)             | NT      | NT        |  |
| Trimethoprim                         | BDL(4)            | BDL(4)         | BDL(4)       | BDL(4)       | BDL(4)       | BDL(4)          | BDL(4)              | BDL(4)            | BDL(4)             | BDL(4)             | NT      | NT        |  |
| Co-trimoxazole                       | BDL(4)            | BDL(4)         | BDL(4)       | BDL(4)       | BDL(4)       | BDL(4)          | BDL(4)              | BDL(4)            | BDL(4)             | BDL(4)             | NT      | NT        |  |
| Chlortetracycline                    | BDL(4)            | BDL(4)         | BDL(4)       | BDL(4)       | BDL(4)       | BDL(4)          | BDL(4)              | BDL(4)            | BDL(4)             | BDL(4)             | NT      | NT        |  |

  

| Antibiotic                           | Tomato (N=4)        |              | Carrot (N=4)      |                   | Radish (N=4) |              | Lettuce (N=4)           |                 |
|--------------------------------------|---------------------|--------------|-------------------|-------------------|--------------|--------------|-------------------------|-----------------|
|                                      | I                   | Sludge       | I                 | Sludge            | I            | Sludge       | I                       | Sludge          |
| Log10 CFU/g wet weight (Mean ± S.D.) |                     |              |                   |                   |              |              |                         |                 |
| Control†                             | 2.77 ± 0.10         | 2.93 ± 0.29  | 3.53 ± 0.25       | 3.33 ± 0.47       | 2.70, D(3)   | 2.76, D(3)   | 5.56 ± 0.13             | 5.19 ± 0.20     |
| Percent Resistance (Mean ± S.D.)     |                     |              |                   |                   |              |              |                         |                 |
| Amikacin                             | BDL(4)              | BDL(4)       | BDL(4)            | BDL(4)            | BDL(4)       | BDL(4)       | BDL(4)                  | BDL(4)          |
| Augmentin                            | D(1), BDL(3)        | BDL(4)       | 57.4 ± 33.2, D(1) | 83.3 ± 12.2, D(1) | D(2), BDL(2) | D(4)         | 11.4 ± 18.8, D(1)       | 5.0 ± 3.9       |
| Ampicillin                           | 113.8, D(1), BDL(2) | D(2), BDL(2) | 13.6, 53.1, D(2)  | 22.1, D(3)        | D(1), BDL(3) | D(2), BDL(2) | 12.1 ± 19.8             | 7.4 ± 2.0       |
| Cefotaxime                           | BDL(4)              | BDL(4)       | BDL(4)            | BDL(4)            | BDL(4)       | BDL(4)       | BDL(4)                  | BDL(4)          |
| Cefoxitin                            | D(1), BDL(3)        | D(4)         | 48.8 ± 16.2, D(1) | <b>85.7 ± 7.6</b> | D(3), BDL(1) | D(3), BDL(1) | 12.3 ± 16.9             | 6.8 ± 6.1       |
| Ceftiofur                            | BDL(4)              | BDL(4)       | BDL(4)            | D(1), BDL(3)      | BDL(4)       | BDL(4)       | BDL(4)                  | BDL(4)          |
| Chloramphenicol                      | BDL(4)              | BDL(4)       | BDL(4)            | BDL(4)            | BDL(4)       | BDL(4)       | BDL(4)                  | BDL(4)          |
| Ciprofloxacin                        | BDL(4)              | BDL(4)       | BDL(4)            | BDL(4)            | BDL(4)       | BDL(4)       | BDL(4)                  | BDL(4)          |
| Gentamycin                           | BDL(4)              | BDL(4)       | BDL(4)            | BDL(4)            | BDL(4)       | BDL(4)       | BDL(4)                  | BDL(4)          |
| Nitrofurantoin                       | BDL(4)              | BDL(4)       | BDL(4)            | BDL(4)            | BDL(4)       | BDL(4)       | BDL(4)                  | BDL(4)          |
| Norfloxacin                          | BDL(4)              | BDL(4)       | BDL(4)            | BDL(4)            | BDL(4)       | BDL(4)       | BDL(4)                  | BDL(4)          |
| Sulfamethoxazole                     | BDL(4)              | BDL(4)       | BDL(4)            | BDL(4)            | BDL(4)       | BDL(4)       | BDL(4)                  | BDL(4)          |
| Tetracycline                         | D(1), BDL(3)        | BDL(4)       | BDL(4)            | BDL(4)            | BDL(4)       | BDL(4)       | BDL(4)                  | BDL(4)          |
| Trimethoprim                         | BDL(4)              | BDL(4)       | BDL(4)            | BDL(4)            | BDL(4)       | BDL(4)       | BDL(4)                  | BDL(4)          |
| Co-trimoxazole                       | BDL(4)              | BDL(4)       | BDL(4)            | BDL(4)            | BDL(4)       | BDL(4)       | BDL(4)                  | BDL(4)          |
| Chlortetracycline                    | BDL(4)              | BDL(4)       | 65.9 ± 28.7, D(1) | 40.5, 76.7, D(2)  | BDL(4)       | D(2), BDL(2) | 2.4, 46.9, D(1), BDL(1) | 4.7 ± 5.4, D(1) |

| Antibiotic        | Carrot (N=8)                         |                           | Radish (N=8)               |                    | Lettuce (N=8)             |                           |
|-------------------|--------------------------------------|---------------------------|----------------------------|--------------------|---------------------------|---------------------------|
|                   | I                                    | Sludge                    | I                          | Sludge             | I                         | Sludge                    |
|                   | Log10 CFU/g wet weight (Mean ± S.D.) |                           |                            |                    |                           |                           |
| Control†          | 2.76 ± 0.540, D(1), BDL(1)           | 3.16 ± 0.331, BDL(1)      | 2.49 ± 0.528, D(4), BDL(1) | 2.21 ± 0.260, D(2) | 3.23 ± 0.263, BDL(1)      | 3.13 ± 0.300              |
|                   | Percent Resistance (Mean ± S.D.)     |                           |                            |                    |                           |                           |
| Amikacin          | BDL(8)                               | BDL(8)                    | BDL(8)                     | BDL(8)             | BDL(8)                    | BDL(8)                    |
| Augmentin         | 53.8 ± 16.4, D(1), BDL(1)            | 54.9 ± 21.7, BDL(1)       | D(2), BDL(6)               | D(1), BDL(7)       | 72.5 ± 46.2, BDL(1)       | 41.8 ± 41.7, D(1)         |
| Ampicillin        | 52.2 ± 31.9, D(3), BDL(1)            | 18.3 ± 12.2, D(2), BDL(1) | D(3), BDL(5)               | 77.8, D(3), BDL(4) | 54.9 ± 39.8, BDL(1)       | 65.3 ± 39.0, D(1)         |
| Cefotaxime        | BDL(8)                               | BDL(8)                    | BDL(8)                     | BDL(8)             | BDL(8)                    | BDL(8)                    |
| Cefoxitin         | 53.3 ± 27.4, BDL(2)                  | 72.0 ± 11.2, BDL(1)       | 139, D(2), BDL(5)          | D(3), BDL(5)       | 32.5 ± 35.1, D(1), BDL(1) | 39.1 ± 29.2, D(1), BDL(1) |
| Ceftiofur         | 88.3 ± 35.1, D(1), BDL(1)            | 80.1 ± 14.8, BDL(1)       | 150, 118, D(3), BDL(3)     | 128, D(2), BDL(5)  | 32.7 ± 20.4, BDL(5)       | 60.8, BDL(7)              |
| Chloramphenicol   | BDL(8)                               | BDL(8)                    | BDL(8)                     | BDL(8)             | BDL(8)                    | BDL(8)                    |
| Ciprofloxacin     | BDL(8)                               | BDL(8)                    | BDL(8)                     | BDL(8)             | BDL(8)                    | BDL(8)                    |
| Gentamycin        | BDL(8)                               | BDL(8)                    | BDL(8)                     | BDL(8)             | BDL(8)                    | BDL(8)                    |
| Nitrofurantoin    | BDL(8)                               | BDL(8)                    | BDL(8)                     | BDL(8)             | BDL(8)                    | BDL(8)                    |
| Norfloxacin       | D(1), BDL(7)                         | BDL(8)                    | BDL(8)                     | BDL(8)             | BDL(8)                    | BDL(8)                    |
| Sulfamethoxazole  | BDL(8)                               | BDL(8)                    | BDL(8)                     | BDL(8)             | BDL(8)                    | BDL(8)                    |
| Tetracycline      | BDL(8)                               | BDL(8)                    | BDL(8)                     | BDL(8)             | BDL(8)                    | BDL(8)                    |
| Trimethoprim      | BDL(8)                               | BDL(8)                    | BDL(8)                     | BDL(8)             | BDL(8)                    | BDL(8)                    |
| Co-trimoxazole    | BDL(8)                               | BDL(8)                    | BDL(8)                     | BDL(8)             | BDL(8)                    | BDL(8)                    |
| Chlortetracycline | BDL(8)                               | BDL(8)                    | BDL(8)                     | BDL(8)             | BDL(8)                    | BDL(8)                    |

2013

Table S8. Distribution of gene targets in organic amendments, biosolids applied in 2011 and sewage sludge applied in 2012. Detection in DNA extracts of amended or unamended control soil sampled at time of vegetable harvest. The 2013 samples are from plots treated with sludge in the spring of 2012. There were 20 independent soil samples taken in 2011, 16 in 2012 and 23/24 in 2013. n/a = Not applicable. An asterisk indicates the target was not evaluated in 2011.

| Targeted genes               | Amendment |      | Treated soil (% detect) |                |                | Control soil (% detect) |                |                |  |
|------------------------------|-----------|------|-------------------------|----------------|----------------|-------------------------|----------------|----------------|--|
|                              | 2011      | 2012 | 2011<br>(n=20)          | 2012<br>(n=16) | 2013<br>(n=24) | 2011<br>(n=20)          | 2012<br>(n=16) | 2013<br>(n=23) |  |
| <b>Incompatibility</b>       |           |      |                         |                |                |                         |                |                |  |
| IncA/C                       | -         | +    | n/a                     | 6.25           | 0              | n/a                     | 18.75          | 4.35           |  |
| IncB/O                       | -         | -    | n/a                     | n/a            | n/a            | n/a                     | n/a            | n/a            |  |
| IncFIA                       | -         | -    | n/a                     | n/a            | n/a            | n/a                     | n/a            | n/a            |  |
| IncFIIA                      | -         | -    | n/a                     | n/a            | n/a            | n/a                     | n/a            | n/a            |  |
| IncFIB                       | -         | +    | n/a                     | 0              | 0              | n/a                     | 0              | 0              |  |
| IncFIC                       | -         | -    | n/a                     | n/a            | n/a            | n/a                     | n/a            | n/a            |  |
| IncF rep                     | -         | -    | n/a                     | n/a            | n/a            | n/a                     | n/a            | n/a            |  |
| IncHII                       | -         | -    | n/a                     | n/a            | n/a            | n/a                     | n/a            | n/a            |  |
| IncHI2                       | -         | -    | n/a                     | n/a            | n/a            | n/a                     | n/a            | n/a            |  |
| IncI1                        | -         | -    | n/a                     | n/a            | n/a            | n/a                     | n/a            | n/a            |  |
| IncK/B                       | -         | -    | n/a                     | n/a            | n/a            | n/a                     | n/a            | n/a            |  |
| IncL/M                       | -         | -    | n/a                     | n/a            | n/a            | n/a                     | n/a            | n/a            |  |
| IncN                         | -         | +    | n/a                     | 31.25          | 0              | n/a                     | 25             | 0              |  |
| IncN <i>kikA</i>             | -         | -    | n/a                     | n/a            | n/a            | n/a                     | n/a            | n/a            |  |
| IncN <i>oriT</i>             | -         | -    | n/a                     | n/a            | n/a            | n/a                     | n/a            | n/a            |  |
| IncN rep                     | -         | -    | n/a                     | n/a            | n/a            | n/a                     | n/a            | n/a            |  |
| IncP <i>korA</i>             | -         | +    | n/a                     | 0              | 0              | n/a                     | 0              | 0              |  |
| IncP <i>oriT</i>             | +         | +    | 80                      | 75             | 66             | 80                      | 75             | 86             |  |
| IncP <i>traG</i>             | -         | -    | n/a                     | n/a            | n/a            | n/a                     | n/a            | n/a            |  |
| IncP <i>trfA1</i>            | +         | -    | 55                      | n/a            | 0              | 60                      | n/a            | 0              |  |
| IncP <i>trfA2</i>            | -         | +    | n/a                     | 0              | 4.2            | n/a                     | 0              | 0              |  |
| IncQ <i>repB</i>             | -         | +    | n/a                     | 0              | 0              | n/a                     | 0              | 0              |  |
| IncQ <i>oriT</i>             | +         | +    | 0                       | 0              | 25             | 0                       | 0              | 26             |  |
| IncQ <i>oriV</i>             | -         | +    | n/a                     | 37.5           | 0              | n/a                     | 25             | 0              |  |
| IncT                         | -         | -    | n/a                     | n/a            | n/a            | n/a                     | n/a            | n/a            |  |
| IncW                         | -         | +    | n/a                     | 68.8           | 8.3            | n/a                     | 81.2           | 0              |  |
| IncW <i>oriT</i>             | -         | -    | n/a                     | n/a            | n/a            | n/a                     | n/a            | n/a            |  |
| IncW <i>oriV</i>             | -         | +    | n/a                     | 12.5           | 0              | n/a                     | 12.5           | 0              |  |
| IncW <i>trwAB</i>            | -         | -    | n/a                     | n/a            | 0              | n/a                     | n/a            | 0              |  |
| IncX                         | -         | -    | n/a                     | n/a            | n/a            | n/a                     | n/a            | n/a            |  |
| IncY                         | -         | +    | n/a                     | 0              | 0              | n/a                     | 0              | 0              |  |
| <b>Integrase</b>             |           |      |                         |                |                |                         |                |                |  |
| <i>int1</i>                  | +         | +    | 55                      | 81.25          | 0              | 25                      | 25             | 0              |  |
| <i>int2</i>                  | -         | +    | n/a                     | 0              | 0              | n/a                     | 0              | 0              |  |
| <i>int3</i>                  | +         | +    | 20                      | 12.5           | 8.3            | 5                       | 0              | 16             |  |
| <b>Antibiotic resistance</b> |           |      |                         |                |                |                         |                |                |  |
| <i>tet(A)</i>                | -         | +    | n/a                     | 68.75          | 0              | n/a                     | 56.25          | 0              |  |
| <i>tet(B)</i>                | -         | -    | n/a                     | n/a            | 0              | n/a                     | n/a            | 0              |  |
| <i>tet(B/P)</i>              | -         | +    | n/a                     | 0              | 0              | n/a                     | 0              | 0              |  |

|                    |     |   |  |     |       |       |  |     |       |       |
|--------------------|-----|---|--|-----|-------|-------|--|-----|-------|-------|
| <i>tet(C)</i>      | -   | - |  | n/a | n/a   | n/a   |  | n/a | n/a   | n/a   |
| <i>tet(M)</i>      | -   | + |  | n/a | 0     | 0     |  | n/a | 0     | 0     |
| <i>tet(O)</i>      | -   | - |  | n/a | n/a   | 0     |  | n/a | n/a   | 0     |
| <i>tet(Q)</i>      | +   | + |  | 0   | 0     | 0     |  | 0   | 0     | 0     |
| <i>tet(S)</i>      | +   | + |  | 0   | 12.5  | 0     |  | 0   | 25    | 0     |
| <i>tet(T)</i>      | +   | + |  | 20  | 25    | 20.8  |  | 25  | 6.25  | 17.4  |
| <i>aad(A)</i>      | +   | + |  | 55  | 87.5  | 33.3  |  | 60  | 81.25 | 30.4  |
| <i>str(A)</i>      | +   | + |  | 75  | 62.5  | 12.5  |  | 45  | 43.75 | 8.7   |
| <i>str(B)</i>      | +   | + |  | 65  | 56.25 | 0     |  | 30  | 25    | 4.4   |
| <i>vga</i>         | -   | - |  | n/a | n/a   | n/a   |  | n/a | n/a   | n/a   |
| <i>vat(B)</i>      | -   | - |  | n/a | n/a   | n/a   |  | n/a | n/a   | n/a   |
| <i>vgb</i>         | -   | - |  | n/a | n/a   | n/a   |  | n/a | n/a   | n/a   |
| <i>sul1</i>        | +   | + |  | 90  | 100   | 29.17 |  | 30  | 87.5  | 34.78 |
| <i>sul2</i>        | +   | - |  | 35  | n/a   | n/a   |  | 30  | n/a   | n/a   |
| <i>sul3</i>        | -   | + |  | n/a | 0     | 0     |  | n/a | 0     | 0     |
| <i>erm(A)</i>      | +   | + |  | 5   | 0     | 0     |  | 5   | 0     | 0     |
| <i>erm(B)</i>      | +   | + |  | 35  | 50    | 0     |  | 10  | 43.75 | 0     |
| <i>erm(C)</i>      | +   | + |  | 0   | 12.5  | 4.17  |  | 15  | 6.25  | 0     |
| <i>erm(E)</i>      | -   | - |  | n/a | n/a   | n/a   |  | n/a | n/a   | n/a   |
| <i>erm(F)</i>      | +   | + |  | 10  | 12.5  | 12.5  |  | 0   | 0     | 12.5  |
| <i>msr(A)</i>      | -   | + |  | n/a | 0     | 0     |  | n/a | 0     | 0     |
| <i>msr(B)</i>      | -   | - |  | n/a | n/a   | n/a   |  | n/a | n/a   | n/a   |
| <i>blaCARB-4</i>   | -   | - |  | n/a | n/a   | n/a   |  | n/a | n/a   | n/a   |
| <i>blaCTX-M*</i>   | n/a | + |  | n/a | 0     | 0     |  | n/a | 12.5  | 0     |
| <i>blaGIM-1</i>    | -   | - |  | n/a | n/a   | n/a   |  | n/a | n/a   | n/a   |
| <i>blaIMP*</i>     | n/a | - |  | n/a | n/a   | n/a   |  | n/a | n/a   | n/a   |
| <i>blaIMP-1</i>    | -   | - |  | n/a | n/a   | n/a   |  | n/a | n/a   | n/a   |
| <i>blaKPC-m*</i>   | n/a | - |  | n/a | n/a   | n/a   |  | n/a | n/a   | n/a   |
| <i>blaNDM-1*</i>   | n/a | - |  | n/a | n/a   | n/a   |  | n/a | n/a   | n/a   |
| <i>blaOXA-18</i>   | -   | - |  | n/a | n/a   | n/a   |  | n/a | n/a   | n/a   |
| <i>blaOXA-20</i>   | +   | + |  | 0   | 31.25 | 0     |  | 0   | 12.5  | 0     |
| <i>blaOXA-48*</i>  | n/a | - |  | n/a | n/a   | n/a   |  | n/a | n/a   | n/a   |
| <i>blaOXAV</i>     | +   | - |  | 5   | n/a   | n/a   |  | 0   | n/a   | n/a   |
| <i>blaOXAI</i>     | +   | + |  | 0   | 43.75 | 16.67 |  | 5   | 31.25 | 0     |
| <i>blaOXAII</i>    | +   | - |  | 0   | n/a   | n/a   |  | 0   | n/a   | n/a   |
| <i>blaOXAIII</i>   | -   | - |  | n/a | n/a   | n/a   |  | n/a | n/a   | n/a   |
| <i>blaLCR-1</i>    | +   | + |  | 0   | 0     | 0     |  | 0   | 6.25  | 0     |
| <i>blaPSE</i>      | -   | + |  | n/a | 6.25  | 0     |  | n/a | 31.25 | 0     |
| <i>blaSHV</i>      | -   | - |  | n/a | n/a   | n/a   |  | n/a | n/a   | n/a   |
| <i>blaSPM-1</i>    | -   | - |  | n/a | n/a   | n/a   |  | n/a | n/a   | n/a   |
| <i>blaTEM*</i>     | n/a | + |  | n/a | 50    | 33.33 |  | n/a | 37.5  | 34.78 |
| <i>blaVIM*</i>     | n/a | - |  | n/a | n/a   | n/a   |  | n/a | n/a   | n/a   |
| <i>blaVIMgen-2</i> | -   | + |  | n/a | 75    | 25    |  | n/a | 75    | 26    |
| <i>qnrA</i>        | -   | + |  | n/a | 0     | 0     |  | n/a | 0     | 0     |
| <i>qnrB</i>        | +   | + |  | 0   | 12.5  | 0     |  | 0   | 0     | 0     |
| <i>qnrS</i>        | -   | + |  | n/a | 43.75 | 0     |  | n/a | 37.5  | 0     |
| <i>fosA-2</i>      | +   | + |  | 35  | 37.5  | 4.17  |  | 40  | 37.5  | 0     |
| <i>vanA</i>        | -   | - |  | n/a | n/a   | n/a   |  | n/a | n/a   | n/a   |

|                 |   |   |  |     |       |      |  |     |      |     |
|-----------------|---|---|--|-----|-------|------|--|-----|------|-----|
| <i>vanB</i>     | - | - |  | n/a | n/a   | n/a  |  | n/a | n/a  | n/a |
| <i>vanC1</i>    | - | - |  | n/a | n/a   | n/a  |  | n/a | n/a  | n/a |
| <i>vanC2/C3</i> | - | + |  | n/a | 31.25 | 4.17 |  | n/a | 37.5 | 0   |

Table S9: Frequency of gene target detection in DNA isolated from vegetables at harvest. Vegetables were grown in plots with inorganic fertilizer only, or with biosolids in 2011 (A) or sludge in 2012 (B). Vegetables were grown in 2013 in the plots treated with sludge in 2012 (C).

| Targeted genes               | 2011 untreated control |        |          |        |        | 2011 biosolids applied |        |          |        |        |
|------------------------------|------------------------|--------|----------|--------|--------|------------------------|--------|----------|--------|--------|
|                              | Tomato                 | Pepper | Cucumber | Carrot | Radish | Tomato                 | Pepper | Cucumber | Carrot | Radish |
|                              | (n=4)                  | (n=4)  | (n=4)    | (n=4)  | (n=4)  | (n=4)                  | (n=4)  | (n=4)    | (n=4)  | (n=3)  |
| <b>Incompatibility</b>       |                        |        |          |        |        |                        |        |          |        |        |
| <i>IncP oriT</i>             | 4                      | 2      | 0        | 4      | 0      | 3                      | 3      | 0        | 4      | 0      |
| <i>IncP trfA1</i>            | 0                      | 4      | 0        | 0      | 0      | 2                      | 2      | 0        | 0      | 0      |
| <i>IncQ oriT</i>             | 0                      | 0      | 0        | 0      | 0      | 0                      | 0      | 0        | 0      | 0      |
| <b>Integrase</b>             |                        |        |          |        |        |                        |        |          |        |        |
| <i>int1</i>                  | 0                      | 0      | 0        | 0      | 3      | 0                      | 0      | 0        | 0      | 3      |
| <i>int3</i>                  | 0                      | 0      | 0        | 0      | 0      | 0                      | 0      | 0        | 1      | 0      |
| <b>Antibiotic resistance</b> |                        |        |          |        |        |                        |        |          |        |        |
| <i>tet(Q)</i>                | 0                      | 0      | 0        | 0      | 0      | 0                      | 0      | 0        | 0      | 0      |
| <i>tet(S)</i>                | 0                      | 0      | 0        | 0      | 0      | 0                      | 0      | 0        | 0      | 0      |
| <i>tet(T)</i>                | 1                      | 4      | 0        | 0      | 0      | 0                      | 4      | 1        | 0      | 0      |
| <i>aad(A)</i>                | 0                      | 4      | 3        | 0      | 0      | 0                      | 4      | 3        | 0      | 0      |
| <i>str(A)</i>                | 1                      | 0      | 2        | 0      | 2      | 0                      | 0      | 0        | 1      | 1      |
| <i>str(B)</i>                | 1                      | 0      | 1        | 0      | 1      | 0                      | 1      | 0        | 2      | 1      |
| <i>sul1</i>                  | 0                      | 0      | 1        | 0      | 0      | 0                      | 2      | 2        | 0      | 0      |
| <i>sul2</i>                  | 3                      | 2      | 0        | 0      | 0      | 2                      | 2      | 0        | 0      | 0      |
| <i>erm(A)</i>                | 0                      | 0      | 0        | 0      | 0      | 0                      | 0      | 0        | 0      | 0      |
| <i>erm(B)</i>                | 1                      | 1      | 2        | 0      | 0      | 1                      | 2      | 2        | 0      | 0      |
| <i>erm(C)</i>                | 0                      | 2      | 0        | 0      | 0      | 1                      | 1      | 1        | 0      | 0      |
| <i>erm(F)</i>                | 0                      | 0      | 0        | 0      | 0      | 0                      | 0      | 0        | 0      | 0      |
| <i>bla<sub>OXA1</sub></i>    | 0                      | 4      | 0        | 0      | 0      | 0                      | 4      | 0        | 0      | 0      |
| <i>bla<sub>OXAII</sub></i>   | 0                      | 0      | 0        | 0      | 0      | 0                      | 0      | 0        | 0      | 0      |
| <i>bla<sub>OXAIV</sub></i>   | 0                      | 0      | 0        | 0      | 0      | 0                      | 0      | 0        | 0      | 0      |
| <i>bla<sub>OXA-20</sub></i>  | 0                      | 0      | 0        | 0      | 0      | 0                      | 0      | 0        | 0      | 0      |
| <i>bla<sub>OXA1cf</sub></i>  | 0                      | 0      | 0        | 0      | 0      | 0                      | 0      | 0        | 0      | 0      |
| <i>qnr(B)</i>                | 0                      | 0      | 0        | 0      | 0      | 0                      | 0      | 0        | 0      | 0      |
| <i>fos(A)</i>                | 4                      | 2      | 0        | 3      | 1      | 4                      | 2      | 0        | 4      | 0      |

**B**

| Targeted genes               | 2012 untreated control |                 |                 |                 | 2012 sludge applied |                 |                 |                 |
|------------------------------|------------------------|-----------------|-----------------|-----------------|---------------------|-----------------|-----------------|-----------------|
|                              | Lettuce<br>(n=4)       | Tomato<br>(n=4) | Radish<br>(n=4) | Carrot<br>(n=4) | Lettuce<br>(n=4)    | Tomato<br>(n=4) | Radish<br>(n=4) | Carrot<br>(n=4) |
| <b>Incompatibility</b>       |                        |                 |                 |                 |                     |                 |                 |                 |
| <i>IncA/C</i>                | 0                      | 1               | 1               | 1               | 0                   | 1               | 0               | 1               |
| <i>IncF1B</i>                | 0                      | 0               | 0               | 0               | 0                   | 0               | 0               | 0               |
| <i>IncN</i>                  | 0                      | 0               | 3               | 4               | 0                   | 0               | 3               | 4               |
| <i>IncP oriT</i>             | 3                      | 4               | 4               | 4               | 4                   | 2               | 4               | 3               |
| <i>IncP trfA2</i>            | 0                      | 0               | 0               | 0               | 0                   | 0               | 0               | 0               |
| <i>IncP korA</i>             | 0                      | 0               | 0               | 0               | 0                   | 0               | 0               | 0               |
| <i>IncQ repB</i>             | 0                      | 0               | 0               | 0               | 0                   | 0               | 0               | 0               |
| <i>IncQ oriV</i>             | 0                      | 0               | 0               | 3               | 0                   | 0               | 0               | 3               |
| <i>IncQ oriT</i>             | 0                      | 0               | 0               | 0               | 0                   | 0               | 0               | 0               |
| <i>IncW oriV</i>             | 0                      | 0               | 3               | 4               | 0                   | 0               | 1               | 3               |
| <i>IncY</i>                  | 2                      | 2               | 4               | 3               | 2                   | 1               | 4               | 4               |
| <b>Integrase</b>             |                        |                 |                 |                 |                     |                 |                 |                 |
| <i>int1</i>                  | 0                      | 4               | 3               | 3               | 0                   | 1               | 3               | 3               |
| <i>int2</i>                  | 0                      | 0               | 0               | 0               | 0                   | 0               | 0               | 0               |
| <i>int3</i>                  | 0                      | 0               | 0               | 0               | 0                   | 0               | 0               | 0               |
| <b>Antibiotic resistance</b> |                        |                 |                 |                 |                     |                 |                 |                 |
| <i>tet(A)</i>                | 2                      | 2               | 3               | 4               | 4                   | 1               | 2               | 2               |
| <i>tet(B)</i>                | 0                      | 0               | 0               | 0               | 0                   | 0               | 0               | 0               |
| <i>tet(M)</i>                | 0                      | 0               | 0               | 0               | 0                   | 0               | 0               | 0               |
| <i>tet(Q)</i>                | 0                      | 0               | 0               | 0               | 0                   | 0               | 0               | 0               |
| <i>tet(S)</i>                | 2                      | 0               | 1               | 2               | 2                   | 0               | 2               | 1               |
| <i>tet(T)</i>                | 0                      | 0               | 2               | 0               | 0                   | 0               | 0               | 0               |
| <i>aad(A)</i>                | 4                      | 0               | 1               | 2               | 4                   | 2               | 1               | 2               |
| <i>str(A)</i>                | 0                      | 3               | 0               | 1               | 2                   | 3               | 2               | 3               |
| <i>str(B)</i>                | 0                      | 3               | 0               | 1               | 1                   | 0               | 1               | 3               |
| <i>sul1</i>                  | 4                      | 4               | 3               | 3               | 4                   | 4               | 2               | 3               |
| <i>sul3</i>                  | 0                      | 0               | 0               | 0               | 0                   | 0               | 0               | 0               |
| <i>erm(A)</i>                | 0                      | 0               | 0               | 0               | 0                   | 0               | 0               | 0               |
| <i>erm(B)</i>                | 4                      | 2               | 0               | 0               | 4                   | 3               | 0               | 1               |
| <i>erm(C)</i>                | 0                      | 0               | 0               | 1               | 0                   | 0               | 1               | 0               |
| <i>erm(F)</i>                | 0                      | 0               | 0               | 0               | 0                   | 0               | 0               | 0               |
| <i>msr(A)</i>                | 0                      | 0               | 0               | 0               | 0                   | 0               | 0               | 0               |
| <i>bla<sub>TEM</sub></i>     | 4                      | 1               | 0               | 1               | 4                   | 1               | 0               | 1               |
| <i>bla<sub>CTX-M</sub></i>   | 1                      | 0               | 0               | 0               | 1                   | 1               | 0               | 0               |
| <i>bla<sub>OXA1</sub></i>    | 3                      | 4               | 0               | 0               | 3                   | 3               | 0               | 0               |
| <i>bla<sub>OXA-20</sub></i>  | 0                      | 0               | 0               | 0               | 3                   | 0               | 2               | 2               |
| <i>bla<sub>OXA1crf</sub></i> | 0                      | 0               | 0               | 0               | 0                   | 0               | 0               | 0               |
| <i>bla<sub>PSE</sub></i>     | 0                      | 0               | 1               | 0               | 0                   | 0               | 1               | 2               |
| <i>Bla<sub>VIMgen</sub></i>  | 0                      | 3               | 4               | 4               | 0                   | 4               | 3               | 4               |
| <i>qnr(A)</i>                | 0                      | 0               | 0               | 0               | 0                   | 0               | 0               | 0               |
| <i>qnr(B)</i>                | 0                      | 0               | 0               | 3               | 0                   | 0               | 0               | 2               |
| <i>qnr(S)</i>                | 0                      | 0               | 4               | 4               | 0                   | 0               | 2               | 4               |
| <i>fos(A)</i>                | 3                      | 0               | 2               | 3               | 1                   | 0               | 3               | 4               |
| <i>van(C2)</i>               | 0                      | 0               | 3               | 4               | 0                   | 0               | 3               | 4               |

**C**

| Targeted genes               | 2013 untreated control |                 |                 |                 | 2013 sludge applied (in 2012) |                 |                 |                 |
|------------------------------|------------------------|-----------------|-----------------|-----------------|-------------------------------|-----------------|-----------------|-----------------|
|                              | Lettuce<br>(n=8)       | Tomato<br>(N/A) | Radish<br>(n=7) | Carrot<br>(n=8) | Lettuce<br>(n=8)              | Tomato<br>(N/A) | Radish<br>(n=8) | Carrot<br>(n=8) |
| <b>Incompatibility</b>       |                        |                 |                 |                 |                               |                 |                 |                 |
| <i>IncA/C</i>                | 0                      | N/A             | 0               | 1               | 0                             | N/A             | 0               | 1               |
| <i>IncF1B</i>                | 0                      | N/A             | 0               | 0               | 0                             | N/A             | 0               | 0               |
| <i>IncN</i>                  | 0                      | N/A             | 0               | 0               | 0                             | N/A             | 0               | 0               |
| <i>IncP oriT</i>             | 8                      | N/A             | 7               | 8               | 8                             | N/A             | 7               | 8               |
| <i>IncP trfA2</i>            | 0                      | N/A             | 1               | 0               | 0                             | N/A             | 2               | 0               |
| <i>IncP korA</i>             | 0                      | N/A             | 0               | 0               | 0                             | N/A             | 0               | 0               |
| <i>IncQ repB</i>             | 0                      | N/A             | 0               | 0               | 0                             | N/A             | 0               | 0               |
| <i>IncQ oriV</i>             | 0                      | N/A             | 0               | 3               | 1                             | N/A             | 0               | 6               |
| <i>IncQ oriT</i>             | 1                      | N/A             | 2               | 6               | 1                             | N/A             | 2               | 8               |
| <i>IncW oriV</i>             | 0                      | N/A             | 0               | 1               | 0                             | N/A             | 0               | 1               |
| <i>IncY</i>                  | 0                      | N/A             | 0               | 0               | 0                             | N/A             | 0               | 0               |
| <b>Integrase</b>             |                        |                 |                 |                 |                               |                 |                 |                 |
| <i>int1</i>                  | 0                      | N/A             | 0               | 0               | 0                             | N/A             | 0               | 0               |
| <i>int2</i>                  | 0                      | N/A             | 0               | 0               | 0                             | N/A             | 0               | 0               |
| <i>int3</i>                  | 0                      | N/A             | 0               | 3               | 0                             | N/A             | 0               | 1               |
| <b>Antibiotic resistance</b> |                        |                 |                 |                 |                               |                 |                 |                 |
| <i>tet(A)</i>                | 0                      | N/A             | 0               | 0               | 0                             | N/A             | 0               | 0               |
| <i>tet(B)</i>                | 6                      | N/A             | 0               | 0               | 3                             | N/A             | 2               | 0               |
| <i>tet(M)</i>                | 0                      | N/A             | 0               | 0               | 0                             | N/A             | 0               | 0               |
| <i>tet(Q)</i>                | 0                      | N/A             | 0               | 0               | 0                             | N/A             | 0               | 0               |
| <i>tet(S)</i>                | 0                      | N/A             | 0               | 0               | 0                             | N/A             | 0               | 0               |
| <i>tet(T)</i>                | 2                      | N/A             | 2               | 0               | 0                             | N/A             | 4               | 0               |
| <i>aad(A)</i>                | 0                      | N/A             | 0               | 7               | 0                             | N/A             | 0               | 8               |
| <i>str(A)</i>                | 0                      | N/A             | 0               | 2               | 0                             | N/A             | 0               | 1               |
| <i>str(B)</i>                | 0                      | N/A             | 0               | 0               | 0                             | N/A             | 0               | 0               |
| <i>sul1</i>                  | 0                      | N/A             | 0               | 2               | 0                             | N/A             | 0               | 3               |
| <i>sul3</i>                  | 0                      | N/A             | 0               | 0               | 0                             | N/A             | 0               | 0               |
| <i>erm(A)</i>                | 0                      | N/A             | 0               | 0               | 0                             | N/A             | 0               | 0               |
| <i>erm(B)</i>                | 0                      | N/A             | 0               | 2               | 0                             | N/A             | 0               | 1               |
| <i>erm(C)</i>                | 0                      | N/A             | 0               | 3               | 0                             | N/A             | 0               | 5               |
| <i>erm(F)</i>                | 2                      | N/A             | 1               | 2               | 2                             | N/A             | 2               | 1               |
| <i>msr(A)</i>                | 0                      | N/A             | 0               | 0               | 0                             | N/A             | 0               | 0               |
| <i>bla<sub>TEM</sub></i>     | 0                      | N/A             | 0               | 7               | 0                             | N/A             | 0               | 8               |
| <i>bla<sub>CTX-M</sub></i>   | 0                      | N/A             | 0               | 0               | 0                             | N/A             | 0               | 0               |
| <i>bla<sub>OXA1</sub></i>    | 0                      | N/A             | 2               | 2               | 2                             | N/A             | 2               | 0               |
| <i>bla<sub>OXA-20</sub></i>  | 0                      | N/A             | 0               | 0               | 0                             | N/A             | 0               | 0               |
| <i>bla<sub>OXA1crf</sub></i> |                        | N/A             |                 |                 |                               | N/A             |                 |                 |
| <i>bla<sub>PSE</sub></i>     | 0                      | N/A             | 0               | 1               | 0                             | N/A             | 1               | 0               |
| <i>Bla<sub>VIMgen</sub></i>  | 0                      | N/A             | 0               | 3               | 0                             | N/A             | 0               | 3               |
| <i>qnr(A)</i>                | 0                      | N/A             | 0               | 0               | 0                             | N/A             | 0               | 0               |
| <i>qnr(B)</i>                | 0                      | N/A             | 0               | 0               | 0                             | N/A             | 0               | 0               |
| <i>qnr(S)</i>                | 0                      | N/A             | 0               | 0               | 0                             | N/A             | 0               | 0               |
| <i>fos(A)</i>                | 0                      | N/A             | 0               | 5               | 0                             | N/A             | 0               | 7               |
| <i>van(C2)</i>               | 1                      | N/A             | 0               | 0               | 1                             | N/A             | 0               | 0               |



Fig S1. Climate conditions during the three seasons of observation in the present study.

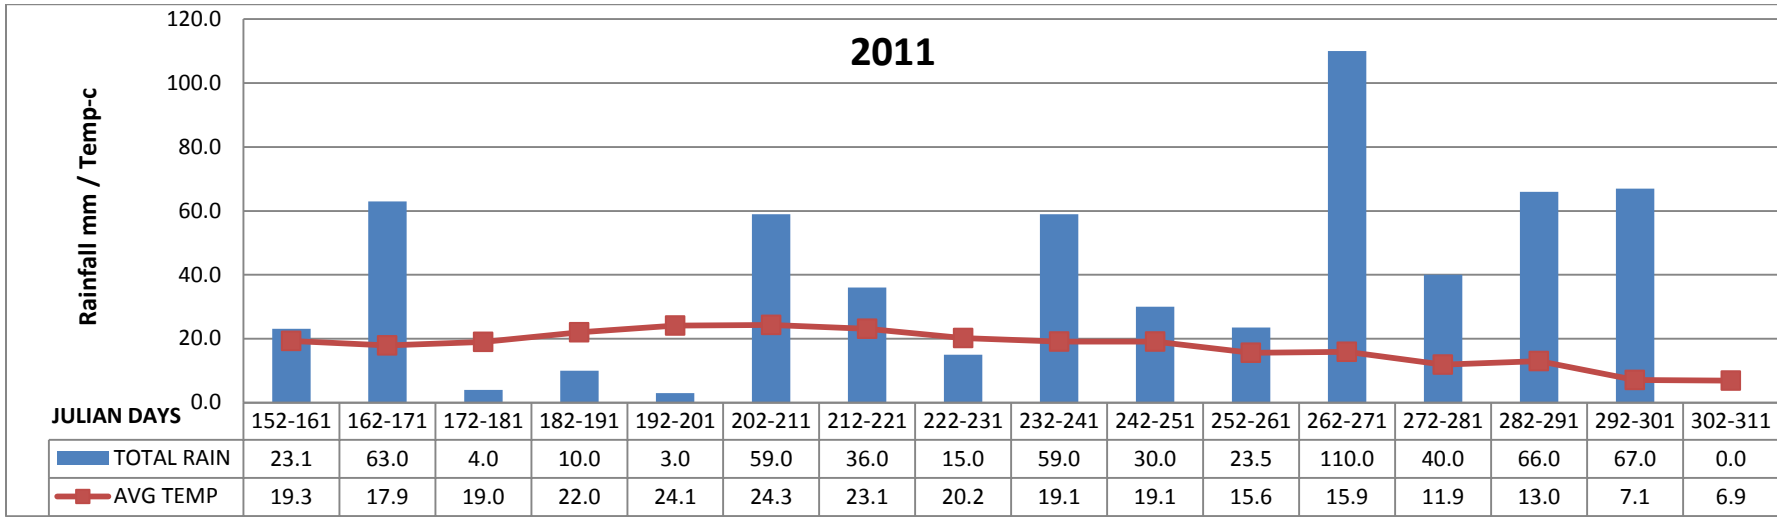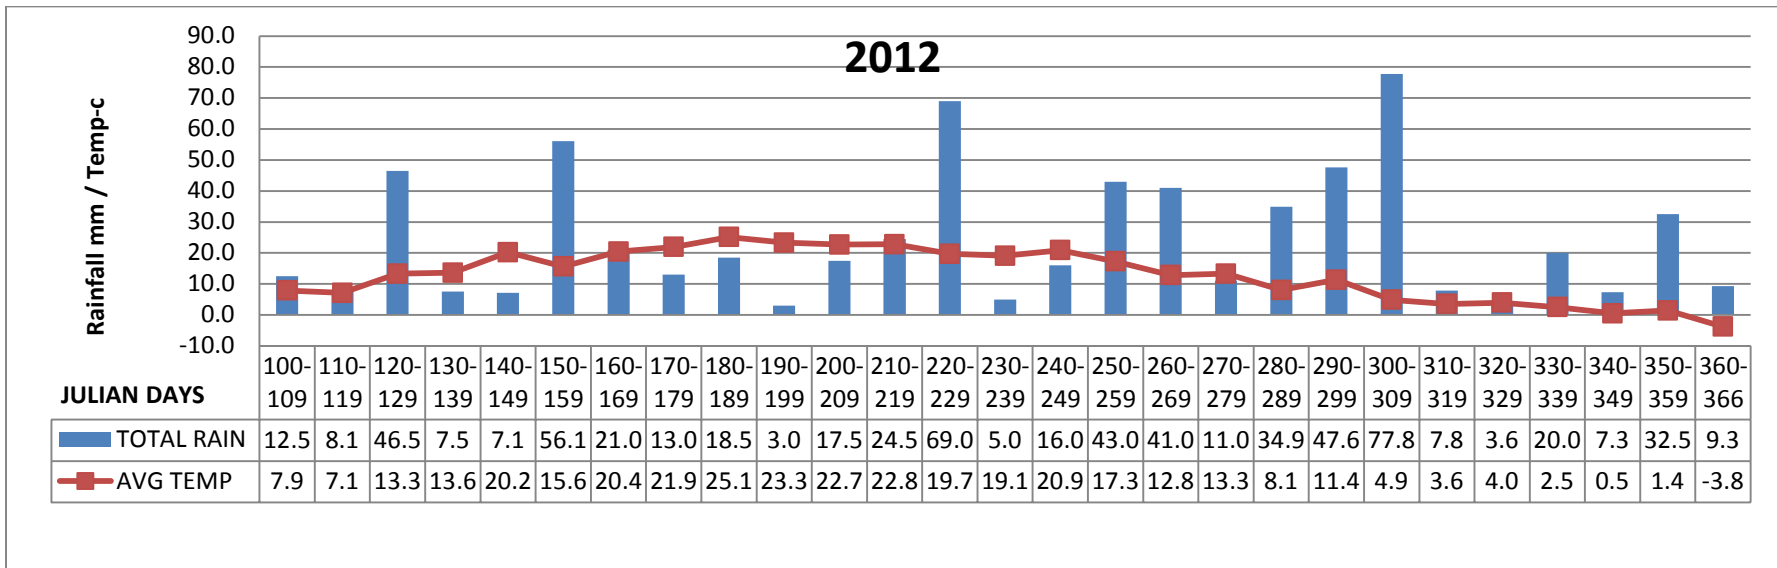

# 2013

Rainfall mm / Temp-c

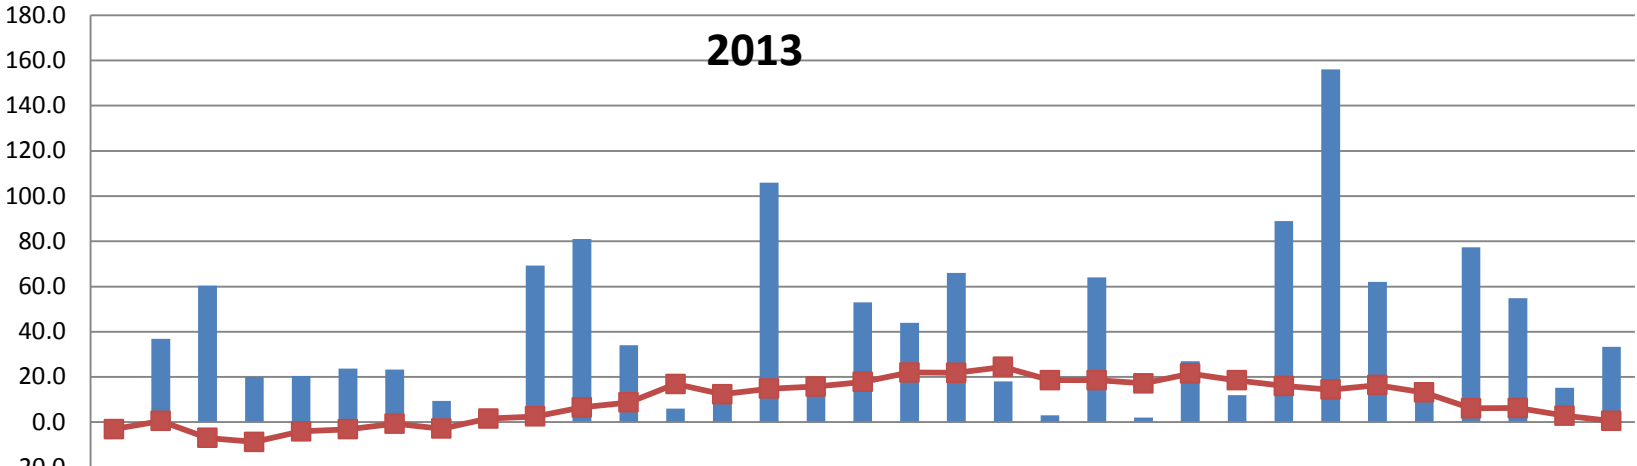

**JULIAN DAYS**

|                   |       |       |       |       |       |       |       |       |        |         |         |         |         |         |         |         |         |         |         |         |         |         |         |         |         |         |         |         |         |         |         |         |      |
|-------------------|-------|-------|-------|-------|-------|-------|-------|-------|--------|---------|---------|---------|---------|---------|---------|---------|---------|---------|---------|---------|---------|---------|---------|---------|---------|---------|---------|---------|---------|---------|---------|---------|------|
| 1-10              | 11-20 | 21-30 | 31-40 | 41-50 | 51-60 | 61-70 | 71-80 | 81-90 | 91-100 | 101-110 | 111-120 | 121-130 | 131-140 | 141-150 | 151-160 | 161-170 | 171-180 | 181-190 | 191-200 | 201-210 | 211-220 | 221-230 | 231-240 | 241-250 | 251-260 | 261-270 | 271-280 | 281-290 | 291-300 | 301-310 | 311-320 | 321-330 |      |
| <b>TOTAL RAIN</b> | 0.9   | 36.9  | 60.3  | 20.0  | 20.4  | 23.7  | 23.3  | 9.4   | 2.4    | 69.3    | 81.0    | 34.0    | 6.0     | 12.0    | 106.0   | 13.0    | 53.0    | 44.0    | 66.0    | 18.0    | 3.0     | 64.0    | 2.0     | 27.0    | 12.0    | 89.0    | 156.0   | 62.0    | 12.6    | 77.4    | 54.9    | 15.2    | 33.3 |
| <b>AVG TEMP</b>   | -3.1  | 0.5   | -7.0  | -8.8  | -4.1  | -3.2  | -0.7  | -2.9  | 1.6    | 2.5     | 6.6     | 8.8     | 16.8    | 12.4    | 14.8    | 15.7    | 17.8    | 22.0    | 21.8    | 24.4    | 18.5    | 18.6    | 17.2    | 21.5    | 18.5    | 16.0    | 14.4    | 16.4    | 13.1    | 6.1     | 6.2     | 2.9     | 0.5  |
